1 **Title:**

2 **Dichotomy of neutralizing antibody, B cell and T cell**  
3 **responses to SARS-CoV-2 vaccination and protection in**  
4 **healthy adults**

5 **Authors:**

6 Edward J Carr<sup>1,\*</sup>, Hermaleigh Townsley<sup>1,2</sup>, Mary Y Wu<sup>1,3</sup>, Katalin A Wilkinson<sup>1,4</sup>, Philip S  
7 Hobson<sup>1</sup>, Dina Levi<sup>1</sup>, Sina Namjou<sup>1</sup>, Harriet V Mears<sup>1</sup>, Agnieszka Hobbs<sup>1,3</sup>, Martina Ragno<sup>1,3</sup>,  
8 Lou S Herman<sup>1,3</sup>, Ruth Harvey<sup>5</sup>, Chris Bailey<sup>1</sup>, Ashley S Fowler<sup>1</sup>, Emine Hatipoglu<sup>2</sup>, Yenting  
9 Ngai<sup>2</sup>, Bobbi Clayton<sup>1</sup>, Murad Miah<sup>1</sup>, Philip Bawumia<sup>1</sup>, Mauro Miranda<sup>1</sup>, Callie Smith<sup>1</sup>,  
10 Chelsea Sawyer<sup>1</sup>, Gavin Kelly<sup>1</sup>, Viyaasan Mahalingasivam<sup>6</sup>, Bang Zheng<sup>6</sup>, Stephen JW  
11 Evans<sup>6</sup>, Vincenzo Libri<sup>2,7</sup>, Andrew Riddell<sup>1</sup>, Jerome Nicod<sup>1</sup>, Nicola O'Reilly<sup>1</sup>, Michael Howell<sup>1</sup>,  
12 Bryan Williams<sup>2,7</sup>, Robert J Wilkinson<sup>1,4,8</sup>, George Kassiotis<sup>1,9</sup>, Charles Swanton<sup>1,7</sup>, Sonia  
13 Gandhi<sup>1,7</sup>, Rupert CL Beale<sup>1,7,10</sup>, David LV Bauer<sup>1,10,\*</sup>, Emma C Wall<sup>1,2</sup>

14 \* corresponding authors

15 ORCID identifiers: EJC: 0000-0001-9343-4593; DLVB: 0000-0003-3052-0368

16 **Affiliations:**

17 <sup>1</sup>The Francis Crick Institute, 1 Midland Road, London, NW1 1AT, UK

18 <sup>2</sup>National Institute for Health Research (NIHR) University College London Hospitals (UCLH)  
19 Biomedical Research Centre and NIHR UCLH Clinical Research Facility, London, UK

20 <sup>3</sup>Covid Surveillance Unit, The Francis Crick Institute, 1 Midland Road, London, NW1 1AT, UK

21 <sup>4</sup>Wellcome Centre for infectious Diseases Research in Africa, University of Cape Town,  
22 Observatory, South Africa

23 <sup>5</sup>Worldwide Influenza Centre, The Francis Crick Institute, 1 Midland Road, London, NW1 1AT,  
24 UK

25 <sup>6</sup>London School of Hygiene & Tropical Medicine, London, WC1E 7HT, UK

26 <sup>7</sup>University College London, Gower Street, London, UK

27 <sup>8</sup>Imperial College London, SW7 2AZ, UK

28 <sup>9</sup>Department of Infectious Disease, St Mary's Hospital, Imperial College London, London, W12  
29 0NN, UK

30 <sup>10</sup>Genotype-to-Phenotype UK National Virology Consortium (G2P-UK)

31

32 **ABSTRACT**

33 **Heterogeneity in SARS-CoV-2 vaccine responses is not understood. Here, we identify**  
34 **four patterns of live-virus neutralizing antibody responses: individuals with hybrid**  
35 **immunity (with confirmed prior infection); rare individuals with low responses (paucity**  
36 **of S1-binding antibodies); and surprisingly, two further groups with distinct serological**  
37 **repertoires. One group – broad responders – neutralize a range of SARS-CoV-2**  
38 **variants, whereas the other – narrow responders – neutralize fewer, less divergent**  
39 **variants. This heterogeneity does not correlate with Ancestral S1-binding antibody,**  
40 **rather the quality of the serological response. Furthermore, IgD<sup>low</sup>CD27<sup>+</sup>CD137<sup>+</sup> B cells**  
41 **and CCR6<sup>+</sup> CD4<sup>+</sup> T cells are enriched in broad responders before dose 3. Notably, broad**  
42 **responders have significantly longer infection-free time after their third dose.**  
43 **Understanding the control and persistence of these serological profiles could allow**  
44 **personalized approaches to enhance serological breadth after vaccination.**

45  
46 **Introduction:**

47 Inter-individual heterogeneity in human immune responses is well-described<sup>1-4</sup>. While  
48 immunological heterogeneity was previously seen as a “nuisance variable”, over the  
49 last 10-20 years, this view has shifted due to new strategies, tools and hypotheses.  
50 Today, the study of the variation between individuals provides novel insights in human  
51 immunology<sup>5</sup>.

52  
53 Alongside the deployment of COVID-19 vaccines as the primary control strategy of  
54 the SARS-CoV-2 pandemic, observational studies were established to generate data  
55 to inform timing of future doses, and to examine vaccine immunogenicity in vulnerable  
56 populations omitted from phase 3 trials. Secondary aims included studying the  
57 mechanisms of vaccine responses for mRNA and adenoviral vectored vaccines,  
58 vaccine platforms not previously used outside of early phase trials, with profound  
59 primary immunological and epidemiological responses<sup>6-8</sup>. We, with colleagues,  
60 established three sentinel UK studies: CAPTURE, studying responses in solid-organ  
61 and hematological cancer patients<sup>9-11</sup>, NAOMI exploring responses in hemodialysis

62 patients <sup>12,13</sup>, and the Legacy study, an observational cohort study of healthy adults  
63 undergoing occupational health screening and vaccination for SARS-CoV-2 <sup>14–16</sup>.  
64 Legacy is a collaboration between the Francis Crick Institute and University College  
65 London Hospitals (clinical trials registration NCT04750356). We have previously  
66 reported on neutralizing ability of sera after two <sup>14,15</sup>, and three doses of vaccine <sup>16</sup>.  
67 Here, we explore inter-individual differences in serological and cellular responses  
68 before and after a third vaccine dose in 283 Legacy participants (**Fig. 1A**) and show  
69 that stratification of individuals based on live-virus neutralization patterns uncovers  
70 previously unrecognized immune differences in otherwise healthy individuals.

71

## 72 **Results:**

73 We hypothesized that inter-individual heterogeneity would exist in the neutralizing  
74 antibody responses after SARS-CoV-2 vaccination. We anticipated identifying three  
75 groups: firstly, those with strong neutralization capacity due to encounters with Spike  
76 during infection episodes, in addition to their vaccinations – so called “hybrid” immunity  
77 <sup>17</sup>; secondly, a small number of partial or low responders where their vaccine-induced  
78 antibody responses were attenuated; and thirdly, a group of “normal” responders,  
79 comprising the bulk of participants. To test this hypothesis, we performed hierarchical  
80 clustering of the neutralizing capacity of 282 pre-dose 3 sera against ancestral SARS-  
81 CoV-2 and seven variants of concern (VOCs, **Fig. 1B**). The first two doses were either  
82 AZD1222 (Oxford/AstraZeneca, n=73) or BNT162b2 (Pfizer-BioNTech, n=209).  
83 Surprisingly, unsupervised clustering identified four groups of individuals, which we  
84 tentatively assigned: individuals with hybrid responses (n=49, 17%), “low responders”  
85 (n=10, 3.5%) and two unexpected further groups, “broad responders” (n=129, 46%)  
86 and “narrow responders” (n=94, 33%), mainly separated by their neutralization (or not)  
87 of Omicron BA.1 before dose 3. To confirm the biological identities of these clusters,  
88 we assessed whether we could identify these four groups using infection history, anti-  
89 S1 and anti-N IgG. We proposed that hybrid responses should be readily identifiable  
90 with exposure history and widely available binding S antibody and anti-N IgG assays.  
91 This strategy confirmed our grouping of individuals with hybrid immunity: 46 individuals  
92 (of 49; 94%) had 47 episodes of prior infections confirmed by the presence of  
93 symptoms (39 episodes, 87.8%), by a molecular test (31 episodes, 66%), or by the  
94 detection of anti-nucleocapsid IgG (44 individuals, 93.6%) (**Fig. 1C**). The ten low  
95 responders were separable from the rest of the cohort by low anti-S1 IgG titers (**Fig.**

96 **1D**), and neutralizing activity restricted to ancestral SARS-CoV-2 (**Fig. 1B**). Hybrid and  
97 low responders could be identified by binding anti-S1 and anti-N IgG individually or  
98 jointly, however these tests distinguished poorly between broad and narrow  
99 responders (**Fig. S1**).

100

101 Having confirmed two biologically relevant groups – low and hybrid responders –  
102 through exposure history and anti-S1/anti-N titers, we next focused on the broad and  
103 narrow responder groups which were not clearly defined by these parameters. We  
104 reasoned that these two groups were likely to reflect similarly important, but hitherto  
105 unrecognized, biological distinctions and therefore sought to further characterize these  
106 groups. From hierarchical clustering with serum drawn just before dose 3, we  
107 observed that 119 of 129 [92.3%] broad responders had serum  $IC_{50} > 40$  for Omicron  
108 BA.1, indicating neutralizing activity against the Omicron BA.1 lineage, whereas only  
109 19 of 94 [20.3%] narrow responders had serum  $IC_{50} > 40$  for Omicron BA.1 ( $\chi^2$  test  
110  $P < 2.2 \times 10^{-16}$ ; **Fig. 1B**). Neutralization titers against Omicron BA.1 before dose 3  
111 therefore offer a population-level surrogate. We found a small fraction of the broad  
112 group was also anti-N positive (31 of 130, 23.8%; **Fig. 1C**), from prior infection. The  
113 vast majority of broad responders was not previously infected by SARS-CoV-2, based  
114 on weekly occupational health screening by RT-qPCR for SARS-CoV-2 infection and  
115 absence of anti-N IgG (**Fig. S2**). Anti-N IgG positive broad responders were positive  
116 from their first serum sample, indicating infection in 2020 (**Fig. S2C**). Focusing on anti-  
117 N IgG negative individuals, there were no differences in age and sex between broad  
118 and narrow responders (**Fig. 1E-F**). We found that BNT162b2 was more commonly  
119 used for doses 1 and 2 than AZD1222 in broad responders, compared to either narrow  
120 or low responders (**Fig. 1G**,  $\chi^2$  test  $P = 0.006$  or  $0.002$  respectively). We excluded  
121 benign explanations for the difference between these two groups: there were no  
122 differences in age or gender between broad N seronegative (N-) or seropositive  
123 individuals (**Fig. S3A-B**); broad N- individuals were more likely to have been  
124 administered BNT162b2 for doses 1 and 2 (**Fig. S3C**); additional spike exposure  
125 through infection provided boosting to anti-S1 titers in broad N+ individuals compared  
126 to N- individuals (**Fig. S3D**); and there were no differences between any of the four  
127 groups in intervals between doses 1 and 2 or between dose 2 and their serum sample  
128 (**Fig. S3E-F**).

129

130 Interestingly, we plotted the trajectories of neutralizing titers against 8 different variants  
131 between doses 2 and 3, and found, that broad and narrow responder groups followed  
132 offset trajectories throughout this period, suggesting that an individual's response is  
133 consistently either broad or narrow, across antigen encounters (**Fig. 1H**). Next, we  
134 considered whether serological breadth initiated by SARS-CoV-2 would include other  
135 coronaviruses. To test this possibility, we performed live-virus microneutralization  
136 assays using HCoV-OC43, a seasonal human coronavirus (**Fig. S4**). We found no  
137 differences in starting titers between broad or narrow responders, and no boosting  
138 effect from SARS-CoV-2 vaccination in either group.

139  
140 Given that neutralizing antibody production is a function of the orchestrated response  
141 of B and CD4<sup>+</sup> T cells after vaccination, we anticipated that underlying lymphocyte  
142 differentiation might give rise to our observed distinct serological profiles. To  
143 determine whether cellular differences contribute to neutralization breadth we  
144 performed mass cytometry in individuals with broad or narrow serological profiles  
145 (n=11 and 6 respectively), before (median 1d [range 10-0]) and after (median 19d  
146 [range 14-21]) their third BNT162b2 dose (**Table S1**). All individuals were anti-N IgG  
147 negative at both timepoints, and all preceding samples. Gating, quality control and  
148 clustering are described in the Methods (**Fig. S5-7**). First, we assessed whether  
149 changes in the B cell compartment were present between individuals with broad and  
150 narrow serological profiles (**Fig. 2A and B**). We expected altered utilization of different  
151 memory B cell compartments between broad and narrow responders. We therefore  
152 compared the pre-dose 3 samples (*i.e.* the long-term memory footprint from dose 2)  
153 between broad and narrow responders, and found that IgD<sup>low</sup>CD27<sup>-</sup>CD137<sup>+</sup> B cells  
154 were more abundant in the broad responders (cluster B3: log<sub>2</sub> fold change 4.3,  $P_{adj}$   
155 0.045 and cluster B7: log<sub>2</sub> fold change 4.1,  $P_{adj}$  0.013, **Fig. 2C**). IgD<sup>low</sup>CD27<sup>-</sup> B cells  
156 are traditionally termed double negative (DN) memory cells, originally described in  
157 ageing and chronic infections and now with newer evidence from many groups  
158 showing roles in healthy serological responses (reviewed in <sup>18</sup>). Following dose 3,  
159 there were no differences in the B cell compartment between broad and narrow  
160 responders that reached statistical significance comparing before and after third-dose  
161 vaccination (**Fig. 2D**).

162

163 The next cellular comparison was the response to vaccination within each serological  
164 profile. Comparing broad responders before and after vaccination, we found a  
165 decrease in the abundance of atypical, double-negative memory B cells that express  
166 CD137 (IgD<sup>low</sup>CD27<sup>-</sup>CD137<sup>+</sup>; cluster B3: log<sub>2</sub> fold change -5.1,  $P_{adj}$  0.0008 and cluster  
167 B7: log<sub>2</sub> fold change -2.4,  $P_{adj}$  0.02, **Fig. 2E**). In narrow responders, we found no  
168 changes in the B cell compartment after vaccination (**Fig. 2F**). For plasmablasts  
169 (cluster B2: CD20<sup>-</sup>CD27<sup>+</sup>CD38<sup>+++</sup>), we observed an expansion in broad responders,  
170 which did not reach our significance threshold (log<sub>2</sub> fold change 1.4,  $P_{adj}$  0.08) and a  
171 smaller, non-significant fold-change in narrow responders (log<sub>2</sub> fold change 0.6,  
172  $P_{uncorrected}$  0.42,  $P_{adj}$  0.52). Finally, we tested for differential vaccine responses between  
173 each serological profile, and found no significant differences (**Fig. 2G**, cluster B7  
174  $P_{adj}$ =0.053).

175  
176 Together, these results suggest that broad responders favor a relatively higher  
177 proportion of DN-CD137<sup>+</sup> memory B cells after two doses, which is perturbed by  
178 further vaccination. Broad responders also had a tendency towards larger plasmablast  
179 responses after dose 3. CD137 expression on human B cells has been shown in  
180 several contexts, including CD11c<sup>+</sup> B cells (a further subgroup of DN memory cells) in  
181 healthy donors, lupus, and systemic sclerosis<sup>19</sup>; healthy B cells stimulated *in vitro*<sup>20</sup>;  
182 and lymphoma, including on Hodgkin Reed-Sternberg cells<sup>20,21</sup>. There are reports of  
183 rare individuals with de-functioning mutations in *TNFRSF9*, the gene encoding CD137  
184 (also called 4-1BB), who display perturbations in B cell biology including a propensity  
185 to autoinflammation and lymphomagenesis, vulnerability to respiratory infections, and  
186 attenuated responses to vaccination<sup>22,23</sup>.

187  
188 Since B cell memory development is cued in part by CD4<sup>+</sup> T<sub>H</sub> cells, we next assessed  
189 the CD4<sup>+</sup> T<sub>H</sub> cell compartment (**Fig. 3A-B**). Before third doses, we found two clusters  
190 were over-represented in narrow responders (cluster H8 CXCR3<sup>+</sup>TCR $\gamma\delta$ <sup>+</sup>: log<sub>2</sub> fold  
191 change -5.6,  $P_{adj}$  3.1 x 10<sup>-6</sup>; cluster H11 NCAM<sup>+</sup>CXCR3<sup>+</sup>TCR $\gamma\delta$ <sup>+</sup>: log<sub>2</sub> fold change -  
192 4.3,  $P_{adj}$  5.9x10<sup>-4</sup>, **Fig. 3C**), and found a CCR7<sup>-</sup>CD27<sup>-</sup>CD28<sup>-</sup>CD45RA<sup>+</sup>CCR6<sup>+</sup>CD57<sup>+</sup>  
193 population (cluster H12) that was “pre-expanded” in broad responders (log<sub>2</sub> fold  
194 change 4.5 and  $P_{adj}$  0.01, **Fig. 3C**). For brevity, we refer to these CD27<sup>-</sup>CD28<sup>-</sup>  
195 CD45RA<sup>+</sup>CCR6<sup>+</sup>CD57<sup>+</sup> CD4<sup>+</sup> T cells as breadth-related T<sub>H</sub> cells (brT<sub>H</sub>). We found no

196 significant differences comparing CD4<sup>+</sup> T cells between the two serological profiles  
197 after vaccination (**Fig. 3D**). Comparing before and after third doses, we found no  
198 significant differences in the abundance of CD4<sup>+</sup> T<sub>H</sub> cell clusters in broad responders  
199 (**Fig. 3E**). However, narrow responders showed a significant decrease in two clusters  
200 in response to vaccination (cluster H8: log<sub>2</sub> fold change -6.3, P<sub>adj</sub> 0.0002; cluster H11:  
201 log<sub>2</sub> fold change -6.4, P<sub>adj</sub> 0.0002, **Fig. 3F**). CD4<sup>+</sup>T cells co-expressing TCR $\gamma\delta^+$  and  
202 TCR $\alpha\beta^+$  have been recently described<sup>24</sup>. Clusters H8 and H11 were distinct from *bona*  
203 *fide* TCR $\gamma\delta^+$  T cells, which we observed as a distinct population adjacent to CD8 T  
204 cells in our PBMC analysis (**Fig. S6**). The only differentially responsive clusters  
205 between broad and narrow individuals were clusters 8 and 11 (**Fig. 3G**). brT<sub>H</sub> are  
206 CCR7-CD45RA<sup>+</sup> suggesting a terminally differentiated effector memory phenotype  
207 (T<sub>emra</sub>)<sup>25</sup>, and further classifiable within a CD27-CD28- T<sub>emra</sub> sub-compartment<sup>26</sup>. A  
208 study examining CD4 responses to Dengue virus, reported two subgroups of Dengue-  
209 specific CD4<sup>+</sup> T<sub>emra</sub>, one of which was CCR6<sup>+</sup> and lacked the expression of cytotoxic  
210 and terminal differentiation markers (perforin and KLRG1) found on CCR6<sup>-</sup> T<sub>emra</sub><sup>27</sup>.  
211 Taken together, these observations suggest that broad responders harbor T<sub>emra</sub>-like  
212 memory populations, which are not terminally differentiated.

213

214 To summarize our multi-dimensional cytometry: examining differences between  
215 individuals with broad and narrow serological profiles showed that broad responders  
216 are marked by the presence of brT<sub>H</sub> cells and DN-CD137<sup>+</sup> B cells before their third  
217 doses. We found a propensity for broad responders to expand their plasmablast  
218 population compared to narrow responders. After the immune stimulus of a third  
219 mRNA vaccination, there were no cellular differences in either B or CD4<sup>+</sup>T<sub>H</sub> cells  
220 populations between broad and narrow responders (**Fig. 2D and 3D**). There are  
221 several possible explanations for this observation. Firstly, vaccination has been shown  
222 to transiently perturb the immune landscape<sup>1,2</sup>, thus cytometry performed during a  
223 time of immune activation may be obfuscated, and overlook intrinsic underlying inter-  
224 individual differences. In this situation, a later timepoint, memory analysis of post-  
225 vaccination may be more informative, as it lacks the overlaid perturbation from a recent  
226 vaccination. Our pre-dose 3 samples provide that retrospective memory assessment  
227 of dose 2, once the early cellular changes have resolved, and is it at that timepoint  
228 that we observed the most striking cellular differences between broad and narrow

229 responders. Secondly, it is possible that narrow responders represent an accelerated  
230 resolution of the cellular changes after doses 1 and 2, with the loss of certain memory  
231 lymphocyte sub-populations rapidly (brT<sub>H</sub> cells and DN-CD137<sup>+</sup> B cells), whereas  
232 broad responders retain a diversity in their cellular responses until after dose 3. If a  
233 third dose were to “reset” the serological profile such that there are no cellular or  
234 serological differences between broad or narrow responders (defined before dose 3),  
235 then we would anticipate that all individuals would have equal susceptibility to infection  
236 after dose 3, as neutralizing antibody is the single best predictor of infection <sup>28,29</sup>.

237  
238 Thus, we next assessed whether membership of these two serologically-defined  
239 groups of broad and narrow responders influenced susceptibility to SARS-CoV-2  
240 infection, after their third doses with Omicron BA.2. Because we expected additional  
241 antigenic exposures to influence breadth (**Fig. 1B**), we censored individuals with  
242 identified BA.1 infection, or who seroconverted to nucleocapsid (at the date of their  
243 first positive anti-N IgG result). Individuals from the lowest age quartile (22-33yo) had  
244 a tendency towards an increased likelihood of experiencing an infection compared to  
245 those from the highest age quartile (53-72yo; **Fig. 4A**). There were no sex-related  
246 differences (**Fig. 4B**). We found that our two serological profiles of interest, broad and  
247 narrow, were significant predictors of time-to-infection (**Fig. 4C**), with participants older  
248 than the median age (>44yo) from the broad group protected from infection relative to  
249 their counterparts in the narrow group. The serological effect was attenuated in 22-  
250 44yo (**Fig. 4C**). To quantify the effect of breadth across the entire age range, we fitted  
251 a Cox proportional hazard model, allowing interactions between breadth and age, and  
252 dividing age into two groups: those older (>44yo) or younger (22-44yo) than the  
253 median (**Fig. 4D**). This model gave a hazard ratio for broad responders of 0.45 (HR,  
254 95% CI 0.22-0.94) in the >44yo age group (the reference age group), implying a ~60%  
255 reduction in infection risk during the Omicron BA.2 wave for broad responders  
256 compared to narrow responders. The interaction term between age and breadth  
257 suggest that the serological effect was attenuated in younger participants  
258 approximately two-fold (**Fig. 4D**). A potential limitation of this analysis is that the timing  
259 of the BA.2 in the UK was at a time when asymptomatic community and occupational  
260 testing was being withdrawn, and when national requirements to isolate after a positive  
261 test ceased, so it is possible the exposure risk varied. In summary, we found that  
262 serologically defined groups of individuals with altered B and T cell compartments



263 were differentially protected from infection after vaccination, especially among older  
264 adults in our cohort.

265

## 266 **Discussion:**

267 Here, we have used detailed serological profiling to uncover inter-individual  
268 heterogeneity in vaccine responses, with corresponding alterations in T and B cell  
269 compartments, and investigated the relationship between these differences in  
270 immunity and subsequent risk of SARS-CoV-2 infection. Serological profiling with live-  
271 virus microneutralization assays identified 4 groups – responders with hybrid  
272 immunity, and those with low, narrow, or broad responses. We have focused on the  
273 apparent dichotomy between the cohort of broad responders who have serological  
274 capacity to neutralize Omicron lineages before their third doses, and the cohort of  
275 narrow responders who do not. We have shown that surrogate classification by binding  
276 anti-S titers by ELISA is inadequate to define these classes of breadth; a range of  
277 neutralization titers against a panel of viruses is required. We have found that broad  
278 responders have specific lymphocyte populations in circulation before dose 3,  
279 including DN-CD137<sup>+</sup> B cells and brT<sub>H</sub>. Our findings are critical in several contexts.  
280 Firstly, to offer personalized risk assessments to current VOCs, or forwards  
281 prognostication, anti-S is inadequate. Secondly, the inter-individual heterogeneity  
282 appears consistent over ~60-100 days — without additional antigen encounter from  
283 infection: evidenced by symptom diaries, PCR screening, anti-N IgG testing (**Fig. S2**).  
284 This observation suggests that breadth might be intrinsic to that individual, with  
285 implications for other vaccine responses (and design), and perhaps for antibody  
286 responses in general including autoimmune contexts. Thirdly, variant-specific booster  
287 trials will require careful interpretation: inadvertently unmatched arms between broad  
288 and narrow could plausibly reverse or obfuscate a true effect. In conclusion, we show  
289 that our serological profiling with high-throughput live-virus microneutralization  
290 identifies immunological and epidemiological inter-individual heterogeneity, where  
291 breadth of neutralizing response is key to protection. Our data suggest serological  
292 breadth of response to vaccination is not a purely stochastic phenomenon in humans,  
293 rather it has important underlying cellular correlates with fertile ground for further study  
294 to understand both the mechanistic underpinnings and their clinical consequences.

295

296

## 297 **Materials and Methods**

298

### 299 **Ethics approvals and study design**

300 The Legacy study (NCT04750356) was established in January 2021 and enrolled two  
301 prospective cohorts. The Legacy study was approved by London Camden and Kings  
302 Cross Health Research Authority (HRA) Research and Ethics committee (REC) IRAS  
303 number 286469 and sponsored by University College London, The study has been  
304 described in our prior interim reports<sup>14–16</sup>. Participants were included if they were an  
305 employee of either UCLH or the Francis Crick Institute and had provided at least one  
306 swab for qRT-PCR testing via the Crick PCR pipeline. At the commencement of the  
307 Legacy study, the Crick PCR pipeline was performing NHS staff and patient testing to  
308 support local NHS Trusts and partners. Participants comprised of patient facing  
309 healthcare workers at UCLH and Crick staff. Study visits with venipuncture were  
310 offered approximately one month after vaccination, and at approximately 3, 6 and 12  
311 months. Participants who experienced infection after two (or more) doses of vaccine  
312 were invited for a study visit approximately 2 weeks after the start of their infection  
313 episode.

314

### 315 **SARS-CoV-2 RT-qPCR**

316 RNA was extracted from nasopharyngeal swabs taken at time of occupational health  
317 screening, as previously described<sup>30</sup>. Viral RNA was detected by RT-qPCR (TaqPath  
318 COVID-19 CE-IVD Kit, ThermoFisher) to confirm SARS-CoV-2 infection. Individuals  
319 reporting symptoms, positive lateral flow tests, or positive external PCR testing were  
320 invited to perform a study nasopharyngeal swab.

321

### 322 **Venipuncture and serum processing**

323 Legacy participants were invited for venipuncture before and after (~10-21d)  
324 vaccinations, with additional samples planned at approximately 3, 6 and 12 months.  
325 After an infection episode, individuals were invited for additional venipuncture after  
326 convalescence (~10-21d). Venipuncture was performed into K2-EDTA (for PBMC), or  
327 SST (serum) vacutainer tubes (BD). Serum was separated within 24 hours.

328

### 329 **PBMC isolation**

330 Whole blood was collected in K2-EDTA tubes and samples were processed within 24  
331 hours. PBMC and plasma were isolated by density-gradient centrifugation for 30  
332 minutes at 1000 x g at RT. Plasma was carefully removed then centrifuged for 10  
333 minutes at 4000 x g to remove debris, aliquoted and stored at -80°C. The cell layer  
334 was then collected and washed twice in PBS by centrifugation for 10 minutes at 300 x  
335 g at RT. PBMC were resuspended in cell freezing medium (Fisher Scientific)  
336 containing 10% DMSO, placed overnight in CoolCell freezing containers (Corning) at  
337 -80°C and then stored in liquid nitrogen tanks until batched analysis.

338

### 339 **Virus variants and culture**

340 The Alpha, Delta and Omicron BA.1 isolates used were the same as previously, and  
341 our viral culture technique is unchanged<sup>14–16</sup>. The SARS-CoV-2 B.1.1.7 isolate  
342 (“Alpha”) was hCoV-19/England/204690005/2020, which carries the D614G, Δ69-70,  
343 Δ144, N501Y, A570D, P681H, T716I, S982A and D1118H mutations in Spike<sup>31</sup>, and  
344 was obtained from Public Health England (PHE), UK, through Prof. Wendy Barclay,  
345 Imperial College London, London, UK via the Genotype-to-Phenotype National  
346 Virology Consortium (G2P-UK). The B.1.617.2 (“Delta”) isolate was MS066352H  
347 (GISAID accession number EPI\_ISL\_1731019), which carries the T19R, K77R,  
348 G142D, Δ156-157/R158G, A222V, L452R, T478K, D614G, P681R, D950N mutations  
349 in Spike, and was kindly provided by Prof. Wendy Barclay, Imperial College London,  
350 London, UK via the Genotype-to-Phenotype National Virology Consortium (G2P-UK).  
351 The BA.1 (“Omicron”) isolate was M21021166, which carries the A67V, Δ69-70, T95I,  
352 Δ142-144, Y145D, Δ211, L212I, G339D, S371L, S373P, S375F, K417N, N440K,  
353 G446S, S477N, T478K, E484A, Q493R, G496S, Q498R, N501Y, Y505H, T547K,  
354 D614G, H655Y, N679K, P681H, A701V, N764K, D796Y, N856K, Q954H, N969K, and  
355 L981F mutations in Spike, and was kindly provided by Prof. Gavin Screaton, University  
356 of Oxford, Oxford, UK via G2P-UK. The Omicron BA.2 isolate carries the T19I, Δ24-  
357 26, A27S, G142D, V213G, G339D, S371F, S373P, S375F, T376A, D405N, R408S,  
358 K417N, N440K, S477N, T478K, E484A, Q493R, Q498R, N501Y, Y505H, D614G,  
359 H655Y, N679K, P681H, N764K, D796Y, Q954H, and N969K mutations in Spike and  
360 was obtained from a Legacy study participant. The Omicron BA.2.12.1 isolate carries  
361 the L452Q and S704L mutations in Spike, in addition to the BA.2 mutations listed  
362 previously, and was kindly provided by Prof. Gavin Screaton, University of Oxford,  
363 Oxford, UK. The Omicron BA.5 isolate carries the T19I, Δ24-26, A27S, Δ69-70,

364 G142D, V213G, G339D, S371F, S373P, S375F, T376A, D405N, R408S, K417N,  
365 N440K, L452R, S477N, T478K, E484A, F486V, Q498R, N501Y, Y505H, D614G,  
366 H655Y, N679K, P681H, N764K, D796Y, Q954H, and N969K mutations in Spike was  
367 obtained from the laboratory of Alex Sigal, Africa Health Research Institute, Durban,  
368 South Africa.

369  
370 All viral isolates were propagated in Vero V1 cells (a gift from Stephen Goodbourn).  
371 Briefly, 50% confluent monolayers of Vero V1 cells were infected with the given SARS  
372 CoV-2 strains at an MOI of approx. 0.001. Cells were washed once with DMEM  
373 (Sigma; D6429), then 5 ml virus inoculum made up in DMEM was added to each T175  
374 flask and incubated at room temperature for 30 minutes. DMEM + 1% FCS (Biosera;  
375 FB-1001/500) was added to each flask. Cells were incubated at 37° C, 5% CO<sub>2</sub> for 4  
376 days until extensive cytopathogenic effect was observed. Supernatant was harvested  
377 and clarified by centrifugation at 2000 rpm for 10 minutes in a benchtop centrifuge.  
378 Supernatant was aliquoted and frozen at -80°C.

379

### 380 **High-throughput live virus microneutralization assay**

381 High-throughput live virus microneutralisation assays were performed as previously  
382 described <sup>14</sup>. In brief, Vero E6 cells (Institut Pasteur) at 90-100% confluency were  
383 infected with given SARS-CoV-2 variants in 384-well format, in the presence of serial  
384 dilutions of patient serum samples. After infection, cells were fixed with 4% final  
385 Formaldehyde, permeabilized with 0.2% TritonX-100, 3% BSA in PBS (v/v), and  
386 stained for SARS-CoV-2 N protein using Biotin-labelled-CR3009 antibody produced  
387 in-house together with a Streptavidin-Alexa488 (S32354, Invitrogen) and cellular DNA  
388 using DAPI (10236276001, Merck). Whole-well imaging at 5x was carried out using  
389 an Opera Phenix (Perkin Elmer) and fluorescent areas and intensity calculated using  
390 the Phenix-associated software Harmony (Perkin Elmer). Inhibition was estimated  
391 from the measured area of infected cells/total area occupied by all cells and expressed  
392 as percentage of maximal (virus only wells). The inhibitory profile of each serum  
393 sample was estimated by fitting a 4-parameter dose response curve executed in  
394 SciPy. Neutralizing antibody titers are reported as the fold-dilution of serum required  
395 to inhibit 50% of viral replication (IC<sub>50</sub>), and are further annotated if they lie above the  
396 quantitative (complete inhibition) range, below the quantitative range but still within the  
397 qualitative range (i.e. partial inhibition is observed but a dose-response curve cannot

398 be fit because it does not sufficiently span the IC50), or if they show no inhibition at  
399 all. Human coronavirus OC43 (HCoV-OC43) neutralization was performed as above,  
400 except Vero E6 cells were substituted for Mv1Lu cells.

401

#### 402 **ELISA and other serological testing**

403 Anti-S1 was performed as described previously<sup>32</sup>. To minimize variation across ELISA  
404 plates, we re-scaled serum OD405 measurements by (i.) subtracting the *plate-wide*  
405 average negative control, (ii.) dividing by the *plate-wide* average positive control and  
406 then (iii.) multiplying by the *study-wide* median of the plate-averaged positive controls.

407

#### 408 **Anti-nucleocapsid IgG detection**

409 Anti-nucleocapsid IgG was measured using the Elecsys Anti-SARS-COV-2 assay  
410 (Roche; 09203095190) run on a Cobas e411 analyser (Roche) in accordance with the  
411 manufacturer's instructions. Serum was used for this immunoassay and results  
412 reported as reactive (positive) or non-reactive (negative), with a semi-quantitative titer.  
413 To separate participants into anti-N positive and negative groups, we used their most  
414 recent anti-N result.

415

#### 416 **Mass cytometry sample processing**

417 Peripheral blood mononuclear cells were thawed in the presence of benzonase (Merck  
418 70746-3, used at 1µl/ml), cells were counted and up to 3 x 10<sup>6</sup> cells were processed  
419 for mass cytometry. Mass cytometry staining was performed using the MaxPar Direct  
420 Immune Profiling Assay (Fluidigm, now Standard Biotools), in line with the  
421 manufacturer's instructions, with T cell expansion panel 3. Once stained and fixed,  
422 cells were stored at -80C and processed in batches. After thawing, cells were stained  
423 with Iridium as per the manufacturer's instructions (Standard Biotools). Events were  
424 collected using a CyTOF XT (Standard Biotools), and were bead-normalized using the  
425 in-built algorithm.

426

| Target antigen | Clone  | Isotope |
|----------------|--------|---------|
| CD45           | HI30   | 89Y     |
| CCR6 (CD196)   | G034E3 | 141Pr   |
| CD123          | 6H6    | 143Nd   |

|                        |          |       |
|------------------------|----------|-------|
| CD19                   | HIB19    | 144Nd |
| CD4                    | RPA-T4   | 145Nd |
| CD8a                   | RPA-T8   | 146Nd |
| CD11c                  | Bu15     | 147Sm |
| CD16                   | 3G8      | 148Nd |
| CD45RO                 | UCHL1    | 149Sm |
| CD45RA                 | HI100    | 150Nd |
| CD161                  | HP-3G10  | 151Eu |
| CCR4 (CD194)           | L291H4   | 152Sm |
| CD25                   | BC96     | 153Eu |
| CD27                   | O323     | 154Sm |
| CD57                   | HNK-1    | 155Gd |
| CXCR3 (CD183)          | G025H7   | 156Gd |
| CXCR5 (CD185)          | J252D4   | 158Gd |
| CD28                   | CD28.2   | 160Gd |
| CD38                   | HB-7     | 161Dy |
| NCAM (CD56)            | NCAM16.2 | 163Dy |
| TCRgd                  | B1       | 164Dy |
| CD294                  | BM16     | 166Er |
| CCR7 (CD197)           | G043H7   | 167Er |
| CD14                   | 63D3     | 168Er |
| CD3                    | UCHT1    | 170Er |
| CD20                   | 2H7      | 171Yb |
| CD66b                  | G10F5    | 172Yb |
| HLA-DR                 | LN3      | 173Yb |
| IgD                    | IA6-2    | 174Yb |
| CD127                  | A019D5   | 176Yb |
| Live/dead intercalator |          | 103Rh |
| DNA1                   |          | 191Ir |
| DNA2                   |          | 193Ir |
| CD134/OX40             | ACT35    | 142Nd |
| TIGIT                  | MBSA43   | 159Tb |

|             |          |       |
|-------------|----------|-------|
| CD69        | FN50     | 162Dy |
| CD279/PD-1  | EH12.2H7 | 165Ho |
| CD366/Tim-3 | F38-2E2  | 169Tm |
| CD278/ICOS  | C398.4A  | 175Lu |
| CD137/4-1BB | 4B4-1    | 209Bi |

427

## 428 **Mass cytometry gating strategy**

429 Events from bead-normalized FCS files were gated as shown in Figs. S5 & S6. This  
430 was performed using R v4.0.0, the following packages: flowCore v2.2.0 <sup>33</sup>,  
431 flowWorkspace v4.2.0, openCyto v2.2.0 <sup>34</sup> and ggcyto v1.18.0 <sup>35</sup>.

432

433 Gated samples were re-saved as FCS files (this allowed the parallel processing of  
434 samples). Gated FCS files were analyzed using CATALYST <sup>36</sup>. As a quality control  
435 step to further filter out dead cells, or debris, we performed clustering within  
436 CATALYST (which itself uses rounds of flowSOM <sup>37</sup> aggregated using  
437 ConsensusClusteringPlus <sup>38</sup>), using the live/dead, DNA1 and DNA2 channels only  
438 (Fig. S7). This returned 3 meta-clusters, one of which was DNA1- and DNA2- negative,  
439 one was dead+ and the largest cluster contained DNA1+, DNA2+,live events. The  
440 DNA1+, DNA2+, live cluster was selected and used for all downstream analyses.  
441 PBMC were then re-clustered using CATALYST and the following markers (selected  
442 to define “types” of cells in PBMC): CD3, CD20, CD19, CD14, CD16, CD161, CD56,  
443 CD45RA, CD45RO, CD4, CD8a, CD11c, live/dead and DNA1 and DNA2. The PBMC  
444 dataset was sub-sampled to 500 cells/sample for visualization with UMAP-embedding  
445 and summary heatmap of marker expression. For differential abundance analyses,  
446 edgeR <sup>39</sup> was used via diffcyt <sup>40</sup>. For differential state analyses, we used limma <sup>41</sup> via  
447 diffcyt. For each population of PBMCs, events were filtered and then re-clustered using  
448 CATALYST and differential expression analyses as before. The optimum number of  
449 meta-clusters was determined by visual inspection of UMAP projections and  
450 heatmaps for each cell type.

451

## 452 **Time to event analysis**

453 Time to event analysis was performed in R using the survival package. Individuals  
454 were left censored on the day they received their third dose. Individuals were right

455 censored on the date of an infection with a variant that was Omicron BA.2, at the last  
456 visit date (participants are asked if they have experienced COVID-19 symptoms in the  
457 interim, and an anti-N IgG level is tested), or at the date of dose 4. Omicron BA.2  
458 infection was confirmed by viral sequencing, by S gene target presence, or if no  
459 nucleic acid testing was available, based upon calendar date. Infection >14d after  
460 dose 3 was considered the event of interest and included infections were the  
461 BA.1/BA.2 BA.2-BA.4/5 assignment was date-based. Days of entry, exit and event  
462 were calculated with respect to the earliest date for dose 3 in the study. Data are  
463 presented as cumulative incidence plots, with at numbers at risk shown. Cox  
464 proportional hazard models were used as described in the text.

465

### 466 **Data analysis**

467 Study data were collected and managed using REDCap electronic data capture tools  
468 hosted at University College London <sup>42,43</sup>. Data were exported from REDCap into R  
469 for visualization and analysis, similar to previously <sup>16</sup>. Neutralizing antibody titers are  
470 reported as IC<sub>50</sub> values. As described above, for each serum sample, four dilutions  
471 (1:40, 1:160, 1:640, 1:2560) are assayed in duplicate. All 8 points are used to fit a 4  
472 parameter curve, and the IC<sub>50</sub> (the fold-dilution corresponding to 50% viral inhibition),  
473 is reported. IC<sub>50</sub> values below 40 and above 2560 are reported as 'weak' or 'complete'  
474 inhibition. For plotting and analysis, winsorizing was used: IC<sub>50</sub> values above the  
475 quantitative limit of detection of the assay (>2560) were recoded as 5120; IC<sub>50</sub> values  
476 below the quantitative limit of the assay (<40) but within the qualitative range were  
477 recoded as 10; data below the qualitative range (i.e. no response observed) were  
478 recoded as 5.

479 All data analysis was performed in R. The statistical tests used are described in the  
480 relevant section of the methods, figure legends or text.

481

### 482 **Online supplemental material**

483 Fig S1 shows receiver operating characteristics for anti-S1 and anti-N IgG for the  
484 prediction of serological profile. Fig S2 displays longitudinal PCRs, symptom diaries  
485 and anti-N IgG to confirm seronaive individuals. Fig S3 shows the demographics,  
486 vaccine usage and dosing intervals for broad anti-N IgG seropositive or seronegative  
487 individuals. Fig S4 shows the neutralization of HCoV-OC43 is not augmented by  
488 SARS-CoV-2 Spike exposure (infections or vaccinations). Figure S5-S7 show the



489 mass cytometry gating strategy, illustrative gating and quality control. Figure S8 shows  
490 PBMC-level analysis of mass cytometry.

491

#### 492 **Data availability**

493 Requests for de-anonymized data will be considered by the Legacy Governance  
494 Board, via [covid-19-legacy-study@crick.ac.uk](mailto:covid-19-legacy-study@crick.ac.uk), to ensure the request is from a genuine  
495 researcher and that legal and ethical obligations are maintained.

496

#### 497 **Acknowledgements:**

498 This work was supported by the National Institute for Health Research University  
499 College London Hospitals Department of Health's NIHR Biomedical Research Centre  
500 (BRC), as well as by the UK Research and Innovation and the UK Medical Research  
501 Council (MR/W005611/1 [Genotype to Phenotype consortium], Rosetrees [M926]),  
502 and by the Francis Crick Institute which receives its core funding from Cancer  
503 Research UK (CC1283, CC2230, CC2166, CC2087, CC2060, CC2041, CC2112), the  
504 UK Medical Research Council (CC1283, CC2230, CC2166, CC2087, CC2060,  
505 CC2041, CC2112), and the Wellcome Trust (CC1283, CC2230, CC2166, CC2087,  
506 CC2060, CC2041, CC2112).

507 The authors would like to thank all the study participants, the staff of the NIHR Clinical  
508 Research Facility at UCLH including Kirsty Adams and Marivic Ricamara. We would  
509 like to thank Jules Marczak, Gita Mistry, Simon Caiden, Matala Dyke, and the staff of  
510 the Scientific Technology Platforms (STPs) and COVID-19 testing pipeline at the  
511 Francis Crick Institute. We thank Prof. Wendy Barclay of Imperial College and the  
512 wider Genotype to Phenotype consortium for the Alpha and Delta strains used in this  
513 study, and Max Whiteley and Thushan I de Silva at The University of Sheffield and  
514 Sheffield Teaching Hospitals NHS Foundation Trust for providing source material. We  
515 thank Prof. Gavin Screaton of the University of Oxford for the Omicron BA.1 strain  
516 used in this study. We thank Khadija Kahn and Alex Sigal of the Africa Health  
517 Research Institute for the Beta and Omicron BA.5 strain used in the study, and Ann-  
518 Katrin Reuschl and Clare Jolly of University College London for propagation. We thank  
519 Dr Laura McCoy of UCL for her original synthesis of the CR3009 protein used in  
520 development of the HTS assay. We also thank Marg Crawford, Robert Goldstone, and  
521 Harshil Patel for generation and processing of sequencing data. We are grateful to the

522 Crick's Legacy Immunology Advisory Group (chaired by Prof. Carola Vinuesa FRS)  
523 for their ongoing support, and to Dr Laurie Tomlinson at London School of Hygiene  
524 and Tropical Medicine for helpful discussions. This research was funded in whole, or  
525 in part, by the Wellcome Trust (CC1283, CC2230, CC2166, CC2087, CC2060,  
526 CC2041, CC2112). For the purpose of Open Access, the author has applied a CC-BY  
527 public copyright licence to any Author Accepted Manuscript version arising from this  
528 submission.

529  
530 Author contributions: EJC conceptualized the project, performed the analysis, co-  
531 wrote the draft and edited the final manuscript. HT performed clinical metadata  
532 curation and laboratory data generation. MYW, KAW, PSH, DL, SN, SH, HVM, AH,  
533 M., LSH, ASH, BC and MM generated laboratory data and processed blood samples.  
534 MYW and RH provided high-throughput live-virus microneutralisation expertise. EM  
535 and YN obtained ethical approval for the Legacy study, with supervision from CSw  
536 and SG. CS and GK performed data curation. VM, BZ and SJWE provided expert input  
537 for the time-to-event analyses. VL, AR, JN, NO'R, BW and MH provided supervision  
538 to teams generating and curating data. RCLB, DLVB and ECW co-wrote the  
539 manuscript. Funding was secured by EJC, CSw, SG, RCLB, DLVB, ECW led the  
540 clinical and laboratory teams to generate the data presented here. EJC, RCLB, DLVB  
541 and ECW are senior authors.

542  
543 Disclosures: CSw reports interests unrelated to this Correspondence: grants from  
544 BMS, Ono-Pharmaceuticals, Boehringer-Ingelheim, Roche-Ventana, Pfizer and  
545 Archer Dx, unrelated to this work; personal fees from Genentech, Sarah Canon  
546 Research Institute, Medicxi, Bicycle Therapeutics, GRAIL, Amgen, AstraZeneca,  
547 BMS, Illumina, GlaxoSmithKline, MSD, and Roche-Ventana, unrelated to this work;  
548 and stock options from Apogen Biotech, Epic Biosciences, GRAIL, and Achilles  
549 Therapeutics, unrelated to this Correspondence. SGam reports funding from  
550 AstraZeneca to evaluate monoclonal antibodies subsequent to this work. DLVB  
551 reports grants from AstraZeneca unrelated to this work. The authors have no  
552 additional financial interests.

553

554

555 **References:**

- 556 1. Carr, E. J. *et al.* The cellular composition of the human immune system is shaped  
557 by age and cohabitation. *Nat Immunol* **17**, 461–468 (2016).
- 558 2. Liston, A., Carr, E. J. & Linterman, M. A. Shaping Variation in the Human  
559 Immune System. *Trends Immunol* **37**, 637–646 (2016).
- 560 3. Brodin, P. *et al.* Variation in the human immune system is largely driven by non-  
561 heritable influences. *Cell* **160**, 37–47 (2015).
- 562 4. Orrù, V. *et al.* Genetic variants regulating immune cell levels in health and  
563 disease. *Cell* **155**, 242–256 (2013).
- 564 5. Pulendran, B. & Davis, M. M. The science and medicine of human immunology.  
565 *Science* **369**, (2020).
- 566 6. Polack, F. P. *et al.* Safety and Efficacy of the BNT162b2 mRNA Covid-19  
567 Vaccine. *N Engl J Med* **383**, 2603–2615 (2020).
- 568 7. Voysey, M. *et al.* Safety and efficacy of the ChAdOx1 nCoV-19 vaccine  
569 (AZD1222) against SARS-CoV-2: an interim analysis of four randomised  
570 controlled trials in Brazil, South Africa, and the UK. *Lancet* **397**, 99–111 (2021).
- 571 8. Baden, L. R. *et al.* Efficacy and Safety of the mRNA-1273 SARS-CoV-2 Vaccine.  
572 *N Engl J Med* **384**, 403–416 (2021).
- 573 9. Fendler, A. *et al.* Functional antibody and T cell immunity following SARS-CoV-2  
574 infection, including by variants of concern, in patients with cancer: the CAPTURE  
575 study. *Nat Cancer* **2**, 1321–1337 (2021).
- 576 10. Fendler, A. *et al.* Omicron neutralising antibodies after third COVID-19 vaccine  
577 dose in patients with cancer. *Lancet* **399**, 905–907 (2022).
- 578 11. Fendler, A. *et al.* Immune responses following third COVID-19 vaccination are  
579 reduced in patients with hematological malignancies compared to patients with  
580 solid cancer. *Cancer Cell* **40**, 114–116 (2022).

- 581 12. Carr, E. J. *et al.* Neutralising antibodies after COVID-19 vaccination in UK  
582 haemodialysis patients. *Lancet* **398**, 1038–1041 (2021).
- 583 13. Carr, E. J. *et al.* Omicron neutralising antibodies after COVID-19 vaccination in  
584 haemodialysis patients. *Lancet* **399**, 800–802 (2022).
- 585 14. Wall, E. C. *et al.* Neutralising antibody activity against SARS-CoV-2 VOCs  
586 B.1.617.2 and B.1.351 by BNT162b2 vaccination. *Lancet* **397**, 2331–2333  
587 (2021).
- 588 15. Wall, E. C. *et al.* AZD1222-induced neutralising antibody activity against SARS-  
589 CoV-2 Delta VOC. *Lancet* S0140-6736(21)01462–8 (2021) doi:10.1016/S0140-  
590 6736(21)01462-8.
- 591 16. Wu, M. *et al.* Three-dose vaccination elicits neutralising antibodies against  
592 omicron. *Lancet* **399**, 715–717 (2022).
- 593 17. Crotty, S. Hybrid immunity. <https://www.science.org/doi/10.1126/science.abj2258>  
594 (2021).
- 595 18. Li, Y., Li, Z. & Hu, F. Double-negative (DN) B cells: an under-recognized effector  
596 memory B cell subset in autoimmunity. *Clin Exp Immunol* **205**, 119–127 (2021).
- 597 19. Rincon-Arevalo, H. *et al.* Deep Phenotyping of CD11c+ B Cells in Systemic  
598 Autoimmunity and Controls. *Front Immunol* **12**, 635615 (2021).
- 599 20. Nakaima, Y., Watanabe, K., Koyama, T., Miura, O. & Fukuda, T. CD137 Is  
600 Induced by the CD40 Signal on Chronic Lymphocytic Leukemia B Cells and  
601 Transduces the Survival Signal via NF- $\kappa$ B Activation. *PLoS One* **8**, e64425  
602 (2013).
- 603 21. Aravinth, S. P. *et al.* Epstein-Barr virus-encoded LMP1 induces ectopic CD137  
604 expression on Hodgkin and Reed-Sternberg cells via the PI3K-AKT-mTOR  
605 pathway. *Leuk Lymphoma* **60**, 2697–2704 (2019).

- 606 22. Alosaimi, M. F. *et al.* Immunodeficiency and EBV-induced lymphoproliferation  
607 caused by 4-1BB deficiency. *J Allergy Clin Immunol* **144**, 574-583.e5 (2019).
- 608 23. Somekh, I. *et al.* CD137 deficiency causes immune dysregulation with  
609 predisposition to lymphomagenesis. *Blood* **134**, 1510–1516 (2019).
- 610 24. Edwards, S. C. *et al.* A population of proinflammatory T cells coexpresses  $\alpha\beta$  and  
611  $\gamma\delta$  T cell receptors in mice and humans. *J Exp Med* **217**, e20190834 (2020).
- 612 25. Sallusto, F., Lenig, D., Förster, R., Lipp, M. & Lanzavecchia, A. Two subsets of  
613 memory T lymphocytes with distinct homing potentials and effector functions.  
614 *Nature* **401**, 708–712 (1999).
- 615 26. Koch, S. *et al.* Multiparameter flow cytometric analysis of CD4 and CD8 T cell  
616 subsets in young and old people. *Immun Ageing* **5**, 6 (2008).
- 617 27. Tian, Y. *et al.* Unique phenotypes and clonal expansions of human CD4 effector  
618 memory T cells re-expressing CD45RA. *Nat Commun* **8**, 1473 (2017).
- 619 28. Khoury, D. S. *et al.* Neutralizing antibody levels are highly predictive of immune  
620 protection from symptomatic SARS-CoV-2 infection. *Nat Med* **27**, 1205–1211  
621 (2021).
- 622 29. Cromer, D. *et al.* Neutralising antibody titres as predictors of protection against  
623 SARS-CoV-2 variants and the impact of boosting: a meta-analysis. *Lancet*  
624 *Microbe* **3**, e52–e61 (2022).
- 625 30. Aitken, J. *et al.* Scalable and robust SARS-CoV-2 testing in an academic center.  
626 *Nat Biotechnol* **38**, 927–931 (2020).
- 627 31. Brown, J. C. *et al.* Increased transmission of SARS-CoV-2 lineage B.1.1.7 (VOC  
628 2020212/01) is not accounted for by a replicative advantage in primary airway  
629 cells or antibody escape. 2021.02.24.432576 Preprint at  
630 <https://doi.org/10.1101/2021.02.24.432576> (2021).

- 631 32. Ng, K. W. *et al.* Preexisting and de novo humoral immunity to SARS-CoV-2 in  
632 humans. *Science* **370**, 1339–1343 (2020).
- 633 33. Ellis, B. *et al.* *flowCore: flowCore: Basic structures for flow cytometry data.*  
634 (2019).
- 635 34. Finak, G. *et al.* OpenCyto: an open source infrastructure for scalable, robust,  
636 reproducible, and automated, end-to-end flow cytometry data analysis. *PLoS*  
637 *Comput Biol* **10**, e1003806 (2014).
- 638 35. Van, P., Jiang, W., Gottardo, R. & Finak, G. ggCyto: next generation open-  
639 source visualization software for cytometry. *Bioinformatics* **34**, 3951–3953  
640 (2018).
- 641 36. Nowicka, M. *et al.* CyTOF workflow: differential discovery in high-throughput  
642 high-dimensional cytometry datasets. *F1000Res* **6**, 748 (2017).
- 643 37. Van Gassen, S. *et al.* FlowSOM: Using self-organizing maps for visualization and  
644 interpretation of cytometry data. *Cytometry A* **87**, 636–645 (2015).
- 645 38. Wilkerson, M. D. & Hayes, D. N. ConsensusClusterPlus: a class discovery tool  
646 with confidence assessments and item tracking. *Bioinformatics* **26**, 1572–1573  
647 (2010).
- 648 39. Robinson, M. D., McCarthy, D. J. & Smyth, G. K. edgeR: a Bioconductor  
649 package for differential expression analysis of digital gene expression data.  
650 *Bioinformatics* **26**, 139–140 (2010).
- 651 40. Weber, L. M., Nowicka, M., Sonesson, C. & Robinson, M. D. diffcyt: Differential  
652 discovery in high-dimensional cytometry via high-resolution clustering. *Commun*  
653 *Biol* **2**, 183 (2019).

- 654 41. Smyth, G. K. Linear models and empirical bayes methods for assessing  
655 differential expression in microarray experiments. *Stat Appl Genet Mol Biol* **3**,  
656 Article3 (2004).
- 657 42. Harris, P. A. *et al.* Research electronic data capture (REDCap)--a metadata-  
658 driven methodology and workflow process for providing translational research  
659 informatics support. *J Biomed Inform* **42**, 377–381 (2009).
- 660 43. Harris, P. A. *et al.* The REDCap consortium: Building an international community  
661 of software platform partners. *J Biomed Inform* **95**, 103208 (2019).
- 662

663 **Supplemental Material**

664

665 Table S1

666 Figs. S1-8 [*at end of PDF – Figs S1-8 after Figs 1-4*]

667

668



669 **Table S1 – Demographics and vaccine characteristics of the mass cytometry**  
 670 **cohort**

671 The primary doses, third doses, age, sex and interval between dose 2 and 3, and  
 672 cumulative anti-N IgG status are summarized for individuals in the mass cytometry  
 673 dataset

| Characteristic                                   | <b>broad, N = 11<sup>1</sup></b> | <b>narrow, N = 6<sup>1</sup></b> |
|--------------------------------------------------|----------------------------------|----------------------------------|
| <b>doses 1 and 2</b>                             |                                  |                                  |
| AZD1222                                          | 0 (0%)                           | 0 (0%)                           |
| BNT162b2                                         | 11 (100%)                        | 6 (100%)                         |
| mRNA1272                                         | 0 (0%)                           | 0 (0%)                           |
| others                                           | 0 (0%)                           | 0 (0%)                           |
| <b>dose 3</b>                                    |                                  |                                  |
| AZD1222                                          | 0 (0%)                           | 0 (0%)                           |
| BNT162b2                                         | 11 (100%)                        | 6 (100%)                         |
| mRNA1272                                         | 0 (0%)                           | 0 (0%)                           |
| others                                           | 0 (0%)                           | 0 (0%)                           |
| <b>Sex</b>                                       |                                  |                                  |
| Female                                           | 9 (82%)                          | 3 (50%)                          |
| Male                                             | 2 (18%)                          | 3 (50%)                          |
| $\chi^2$ test $P=0.4$                            |                                  |                                  |
| <b>Age</b>                                       |                                  |                                  |
|                                                  | 56 [54-61]                       | 62 [48-64]                       |
| 2 tailed Mann Whitney $P=0.6$                    |                                  |                                  |
| <b>Interval between dose 3 and 2 [days]</b>      |                                  |                                  |
|                                                  | 193.0 [188.5-195.0]              | 192.5 [189.0-198.2]              |
| 2 tailed Mann Whitney $P=0.6$                    |                                  |                                  |
| <b>anti-N IgG results up-to 28d after dose 3</b> |                                  |                                  |
| all negative                                     | 11 (100%)                        | 6 (100%)                         |

674 <sup>1</sup>n (%); Median [25%-75%]

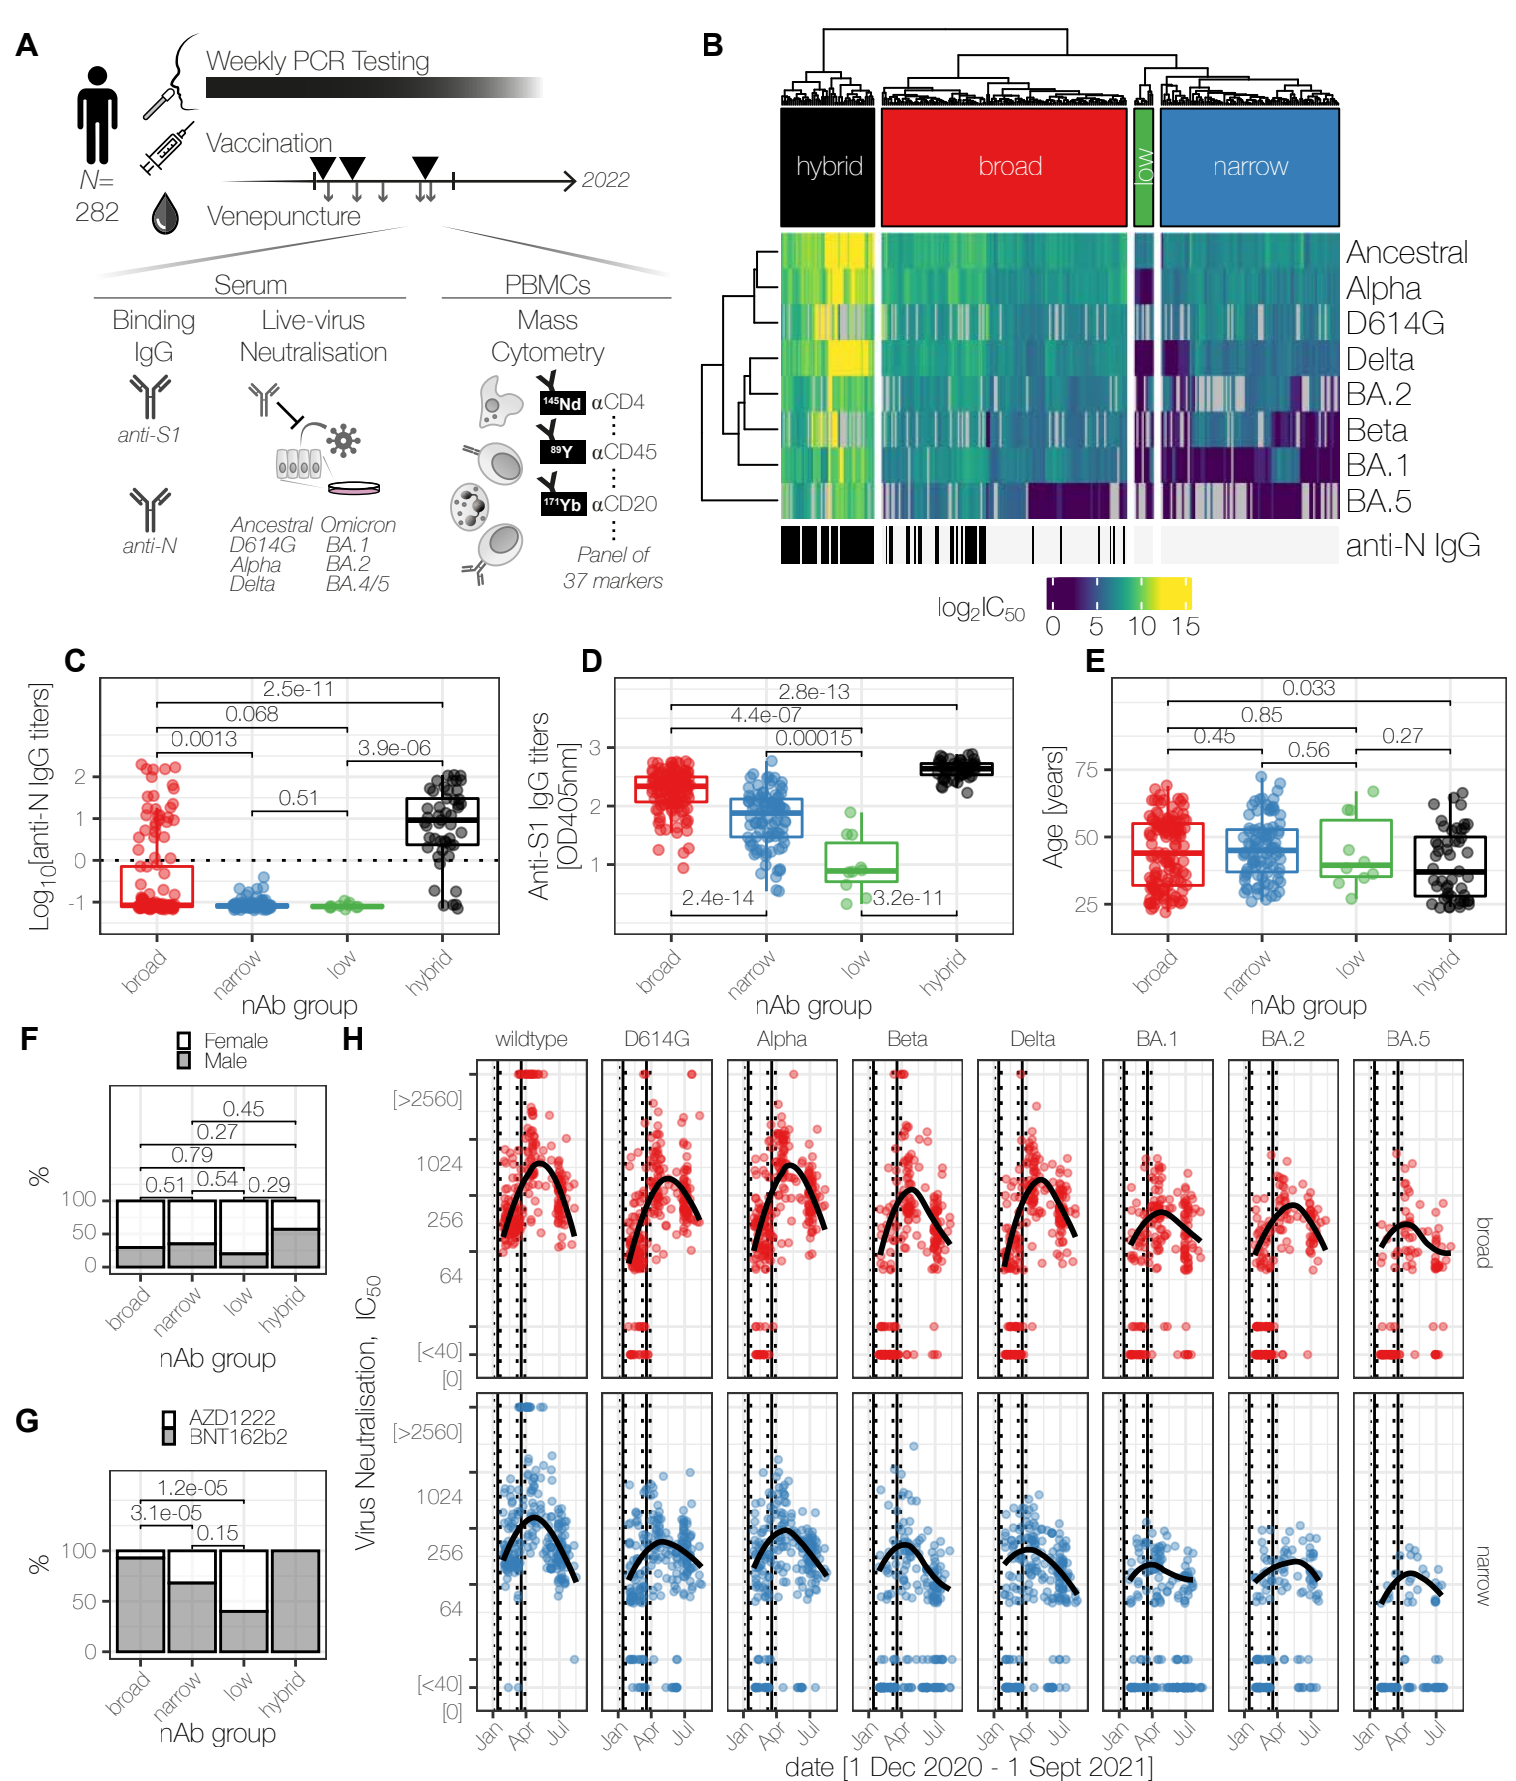

**Figure 1. Serological profiling of Legacy participants identifies heterogeneity in patterns of SARS-CoV-2 neutralization**  
**(A)** Study design, longitudinal sampling and assays performed for 282 healthcare or laboratory workers. **(B)** Hierarchical clustering of live-virus neutralizing antibody titers before dose 3. Each individual is represented by a column and each SARS-CoV-2 variant by a row. The  $\log_2 IC_{50}$  is shown by the color bar, and missing data are in grey. Both rows and columns are clustered using Euclidean distances and anti-N IgG status is indicated. In the color bar above the heatmap, the label of each groups is shown: hybrid, broad, low, and narrow responders in black, red, green and blue respectively. **(C)** anti-N IgG titers. **(D)** anti-S1 IgG titers. **(E)** participant age at enrollment. **(F)** Participant sex, and **(G)** vaccines used for doses 1 and 2, for anti-N negative individuals. **(H)** Trajectory neutralizing antibody titers between doses 1 and 3 of anti-N negative individuals from broad and narrow clusters. In (C)-(E) and (F)-(G) *P* values are from two-tailed unpaired Mann-Whitney tests or  $\chi^2$  tests respectively. In (H), smoothed splines were restricted to data within the quantitative range of the assay, and vertical solid and dashed lines represent the median and inter-quartile ranges of the dates of doses 1 and 2.

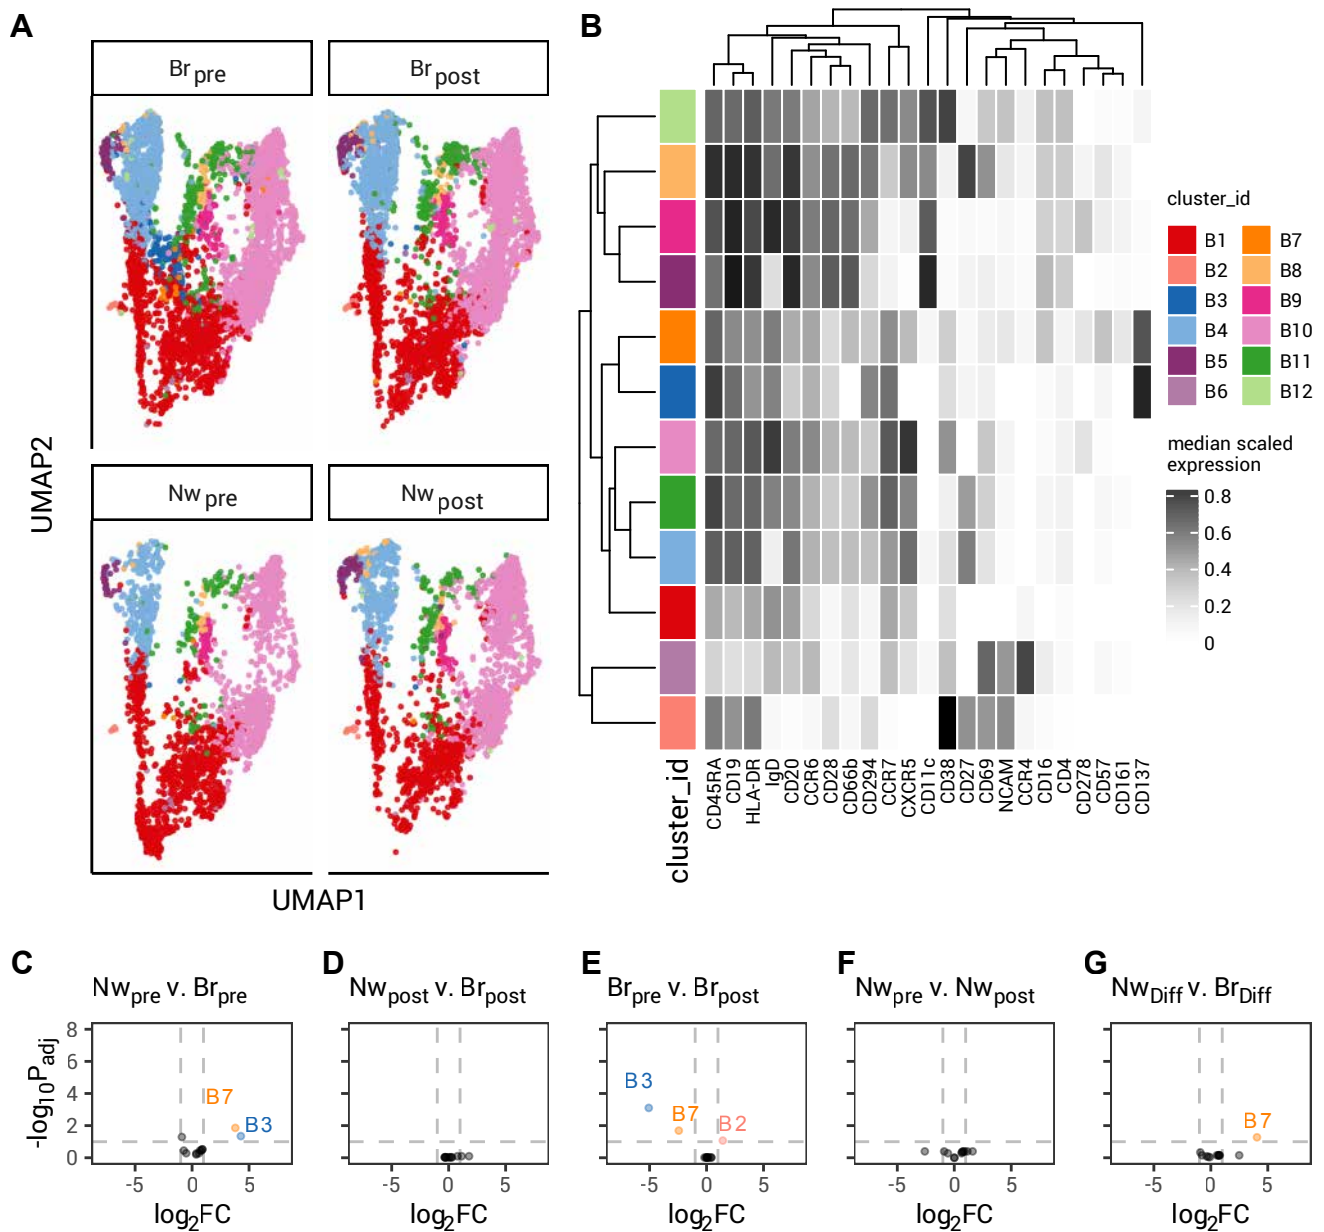

**Figure 2. Mass cytometry demonstrates altered B cell sub-populations between broad and narrow responders before and after third doses**

**(A)** UMAP embedding of B cells separated by breadth (Nw narrow, n=6; Br broad, n=11) and before (pre) and after (post) vaccination. 12 clusters identified by FlowSOM and ConsensusClusteringPlus are shaded. **(B)** Heatmap of surface expression of selected markers for the clusters shown in (A), and their color key is shared. Columns reflect the labelled cell surface marker. Scaled expression is shown from white (low/no expression) to black (high expression). **(C)-(G)** Differential abundance analysis for the 12 B cell clusters shown in (A) and (B), for the comparisons indicated: narrow pre vs broad pre in (C); narrow post vs broad post in (D); broad pre vs. broad post in (E); narrow pre vs. narrow post in (F); and the difference between (narrow pre vs. narrow post) and (broad pre vs. broad post) in (G). For (C-G), log<sub>2</sub> fold change  $\pm 1$  and  $P_{adj}=0.01$  are shown by dashed lines. Color keys are shared (A-G).

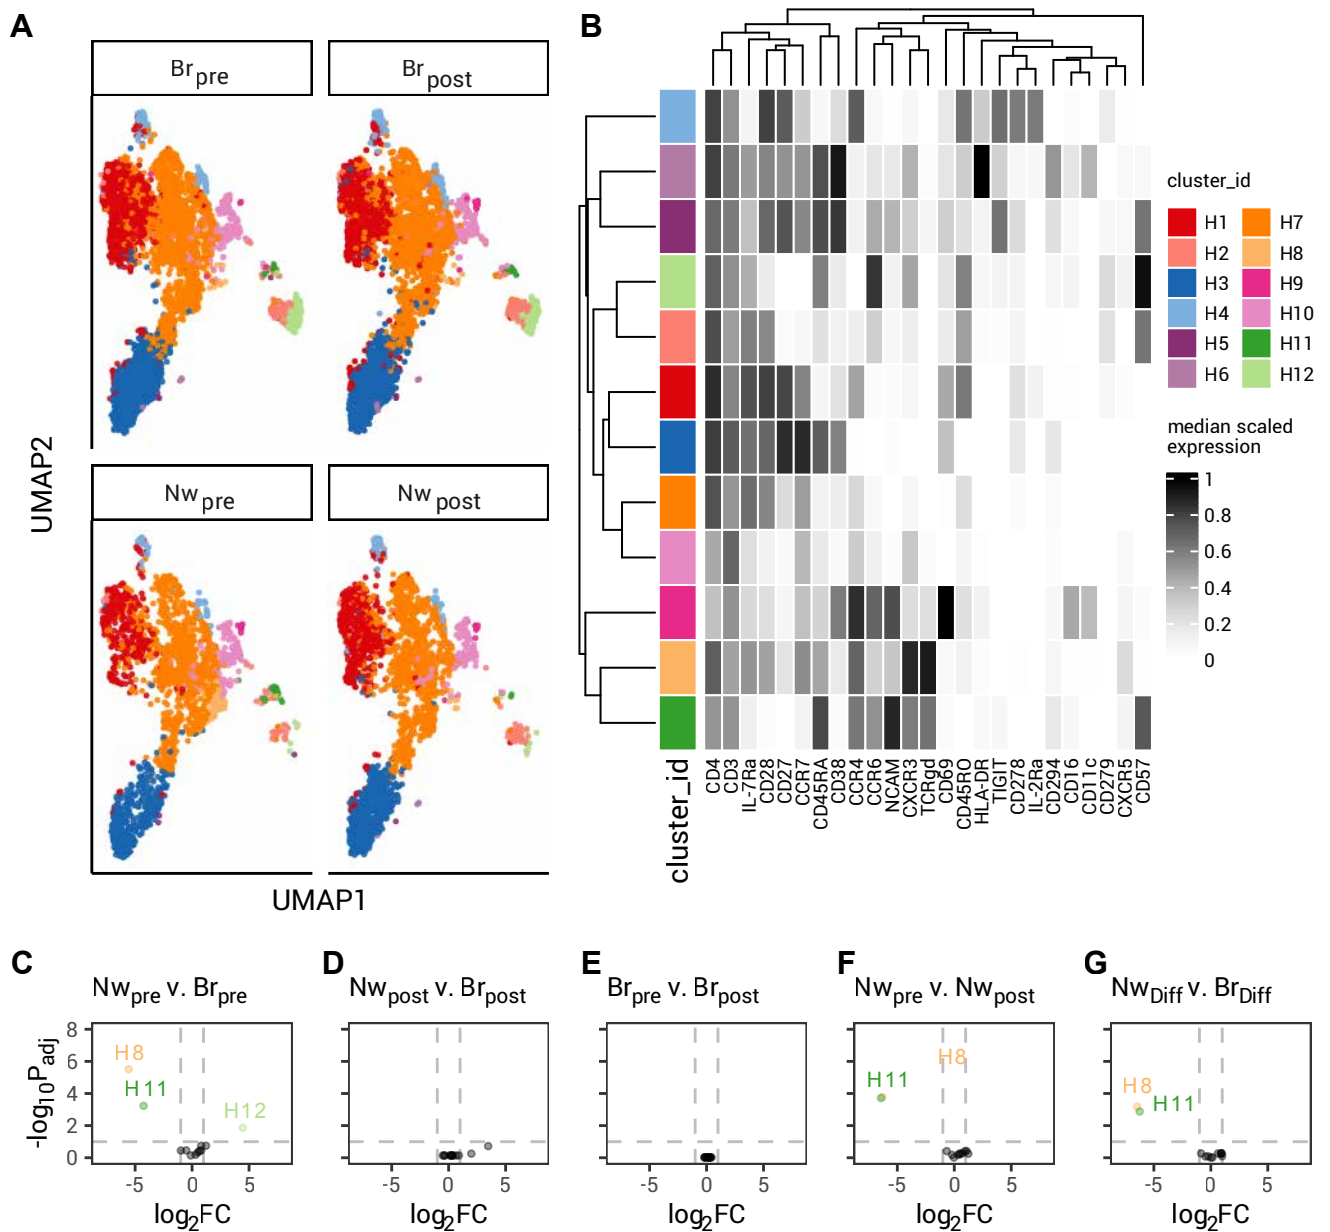

**Figure 3. Perturbations in the CD4<sup>+</sup> T cell compartment between broad and narrow responders before and after third doses**

**(A)** UMAP embedding of CD4<sup>+</sup> T cells separated by breadth (Nw narrow, n=6; Br broad, n=11) and before (pre) and after (post) vaccination. 12 clusters identified by FlowSOM and ConsensusClusteringPlus are shaded. **(B)** Heatmap of surface expression of selected markers for the clusters shown in (A). Rows represent the clusters shown in (A), and their color key is shared. Columns reflect the labelled cell surface marker. Scaled expression is shown from white (low/no expression) to black (high expression). **(C)-(G)** Differential abundance analysis for the 12 CD4<sup>+</sup> T cell clusters shown in (A) and (B), for the comparisons indicated: narrow pre vs broad pre in (C); narrow post vs broad post in (D); broad pre vs. broad post in (E); narrow pre vs. narrow post in (E); and the difference between (narrow pre vs. narrow post) and (broad pre vs. broad post) in (G). For (C-G),  $\log_2$  fold change  $\pm 1$  and  $P_{adj}=0.01$  are shown by dashed lines. Color keys are shared (A-G).

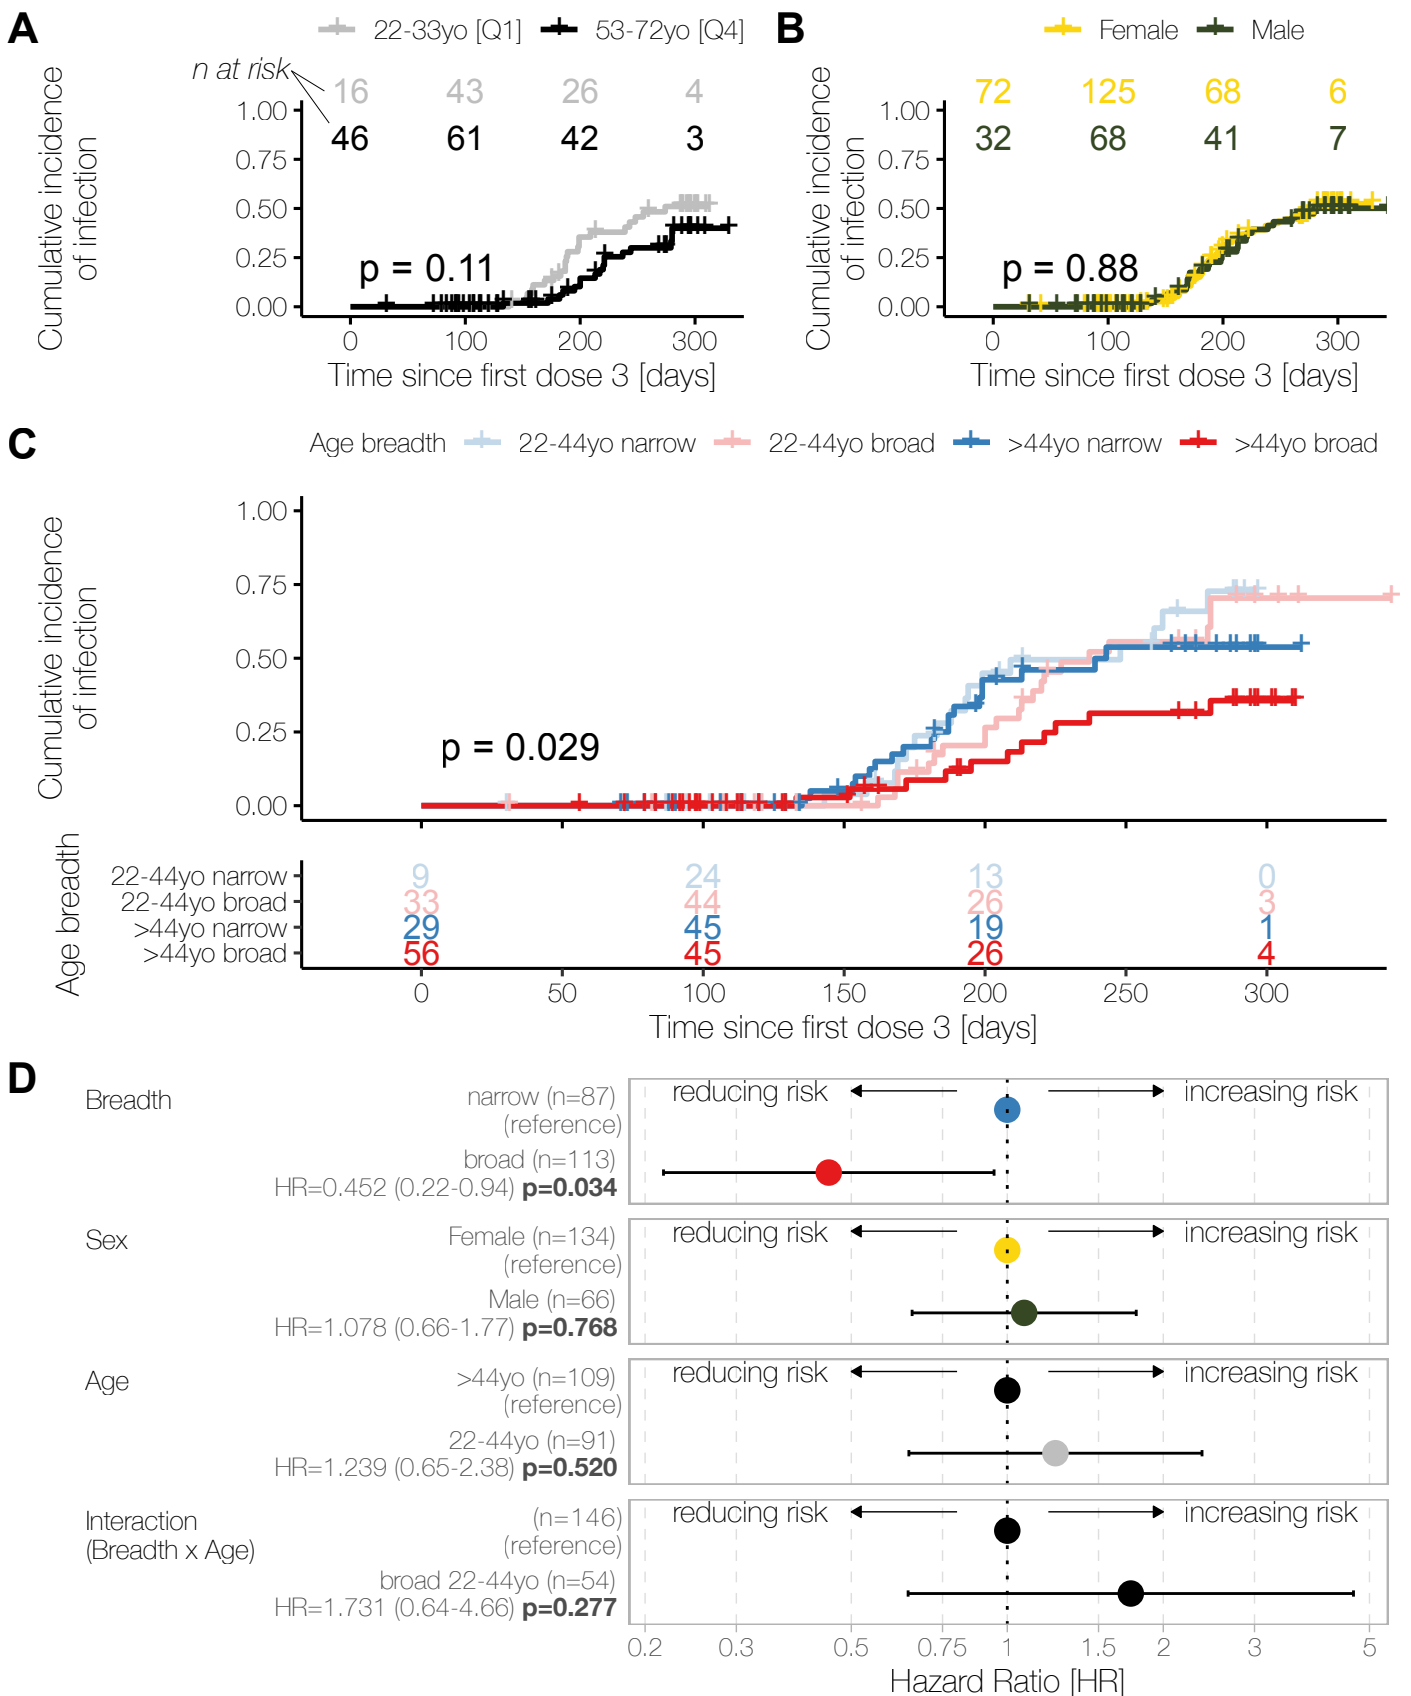

**Figure 4. Individuals with broad neutralizing responses are relatively protected from Omicron BA.2 infection**  
**(A)** and **(B)** Time-to-event analysis for the acquisition of an Omicron BA.2 infection >14d after dose 3 in individuals in the first and last age quartiles: 22-33 years old (yo; Q1, grey) or 53-72 yo (Q4, black) (A); or in female (yellow) or male (green) participants (B). **(C)** Time-to-event analysis for the acquisition of an Omicron BA.2 infection >14d after dose 3 with two age groups (22-44yo, Q1-Q2; 44-72yo, >44yo, Q3-Q4), and by breadth of neutralization responses before dose 3. **(D)** Forest plot of proportional hazard ratios from a Cox proportional hazard model, with breadth, sex, age groups and the interaction term between breadth and age as predictors. For age, >44yo is used as the reference group (hazard ratio, HR=1); for breadth and sex, narrow and female are used as the respective reference group (HR=1). In (A)-(D), left-censoring occurs on the day of that individual's third dose and right censored with a non-BA.2 infection, or their last study visit before their fourth dose. In (A)-(C), the x-axis is the time in days since the earliest third dose, and P values are the log likelihood ratio test from a Cox model. The numbers at risk are shown for each group within the graph (A) and (B), or tabulated below (C).



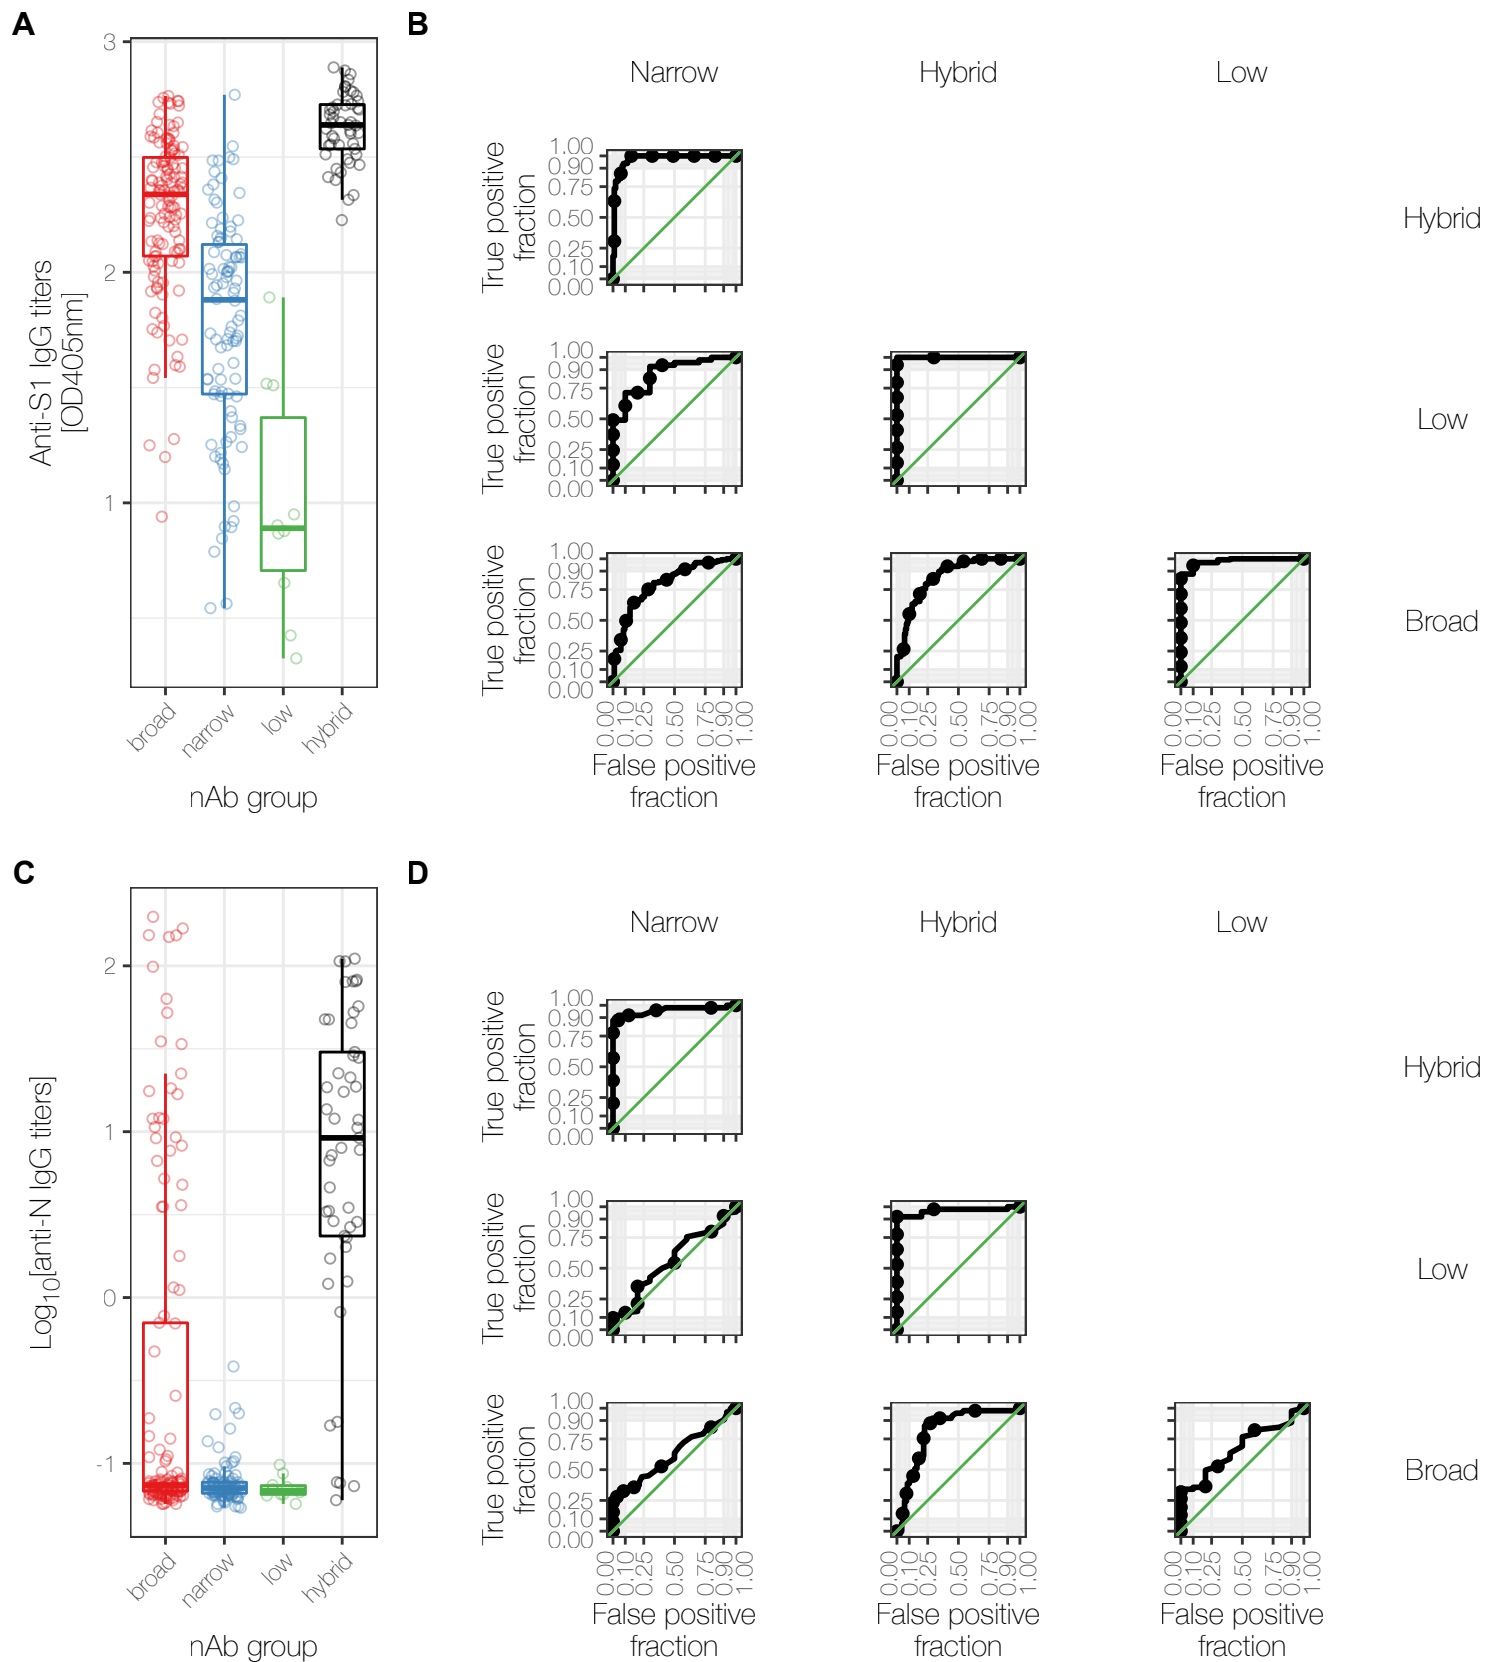

Figure S1. **Receiver operating characteristic for anti-S1 and anti-N IgG predicting serological profile**  
**(A)** Titres of anti-S1 IgG, reported as scaled absorbance at OD405nm, for all 4 serological profile groups. **(B)** Receiver operating characteristic (ROC) curves for anti-S1 IgG titres in (A), between the indicated serological profile groups. **(C)** Decimal logarithm of anti-N IgG titres for all 4 serological groups. **(D)** As in (B), using anti-N IgG titres from (C).

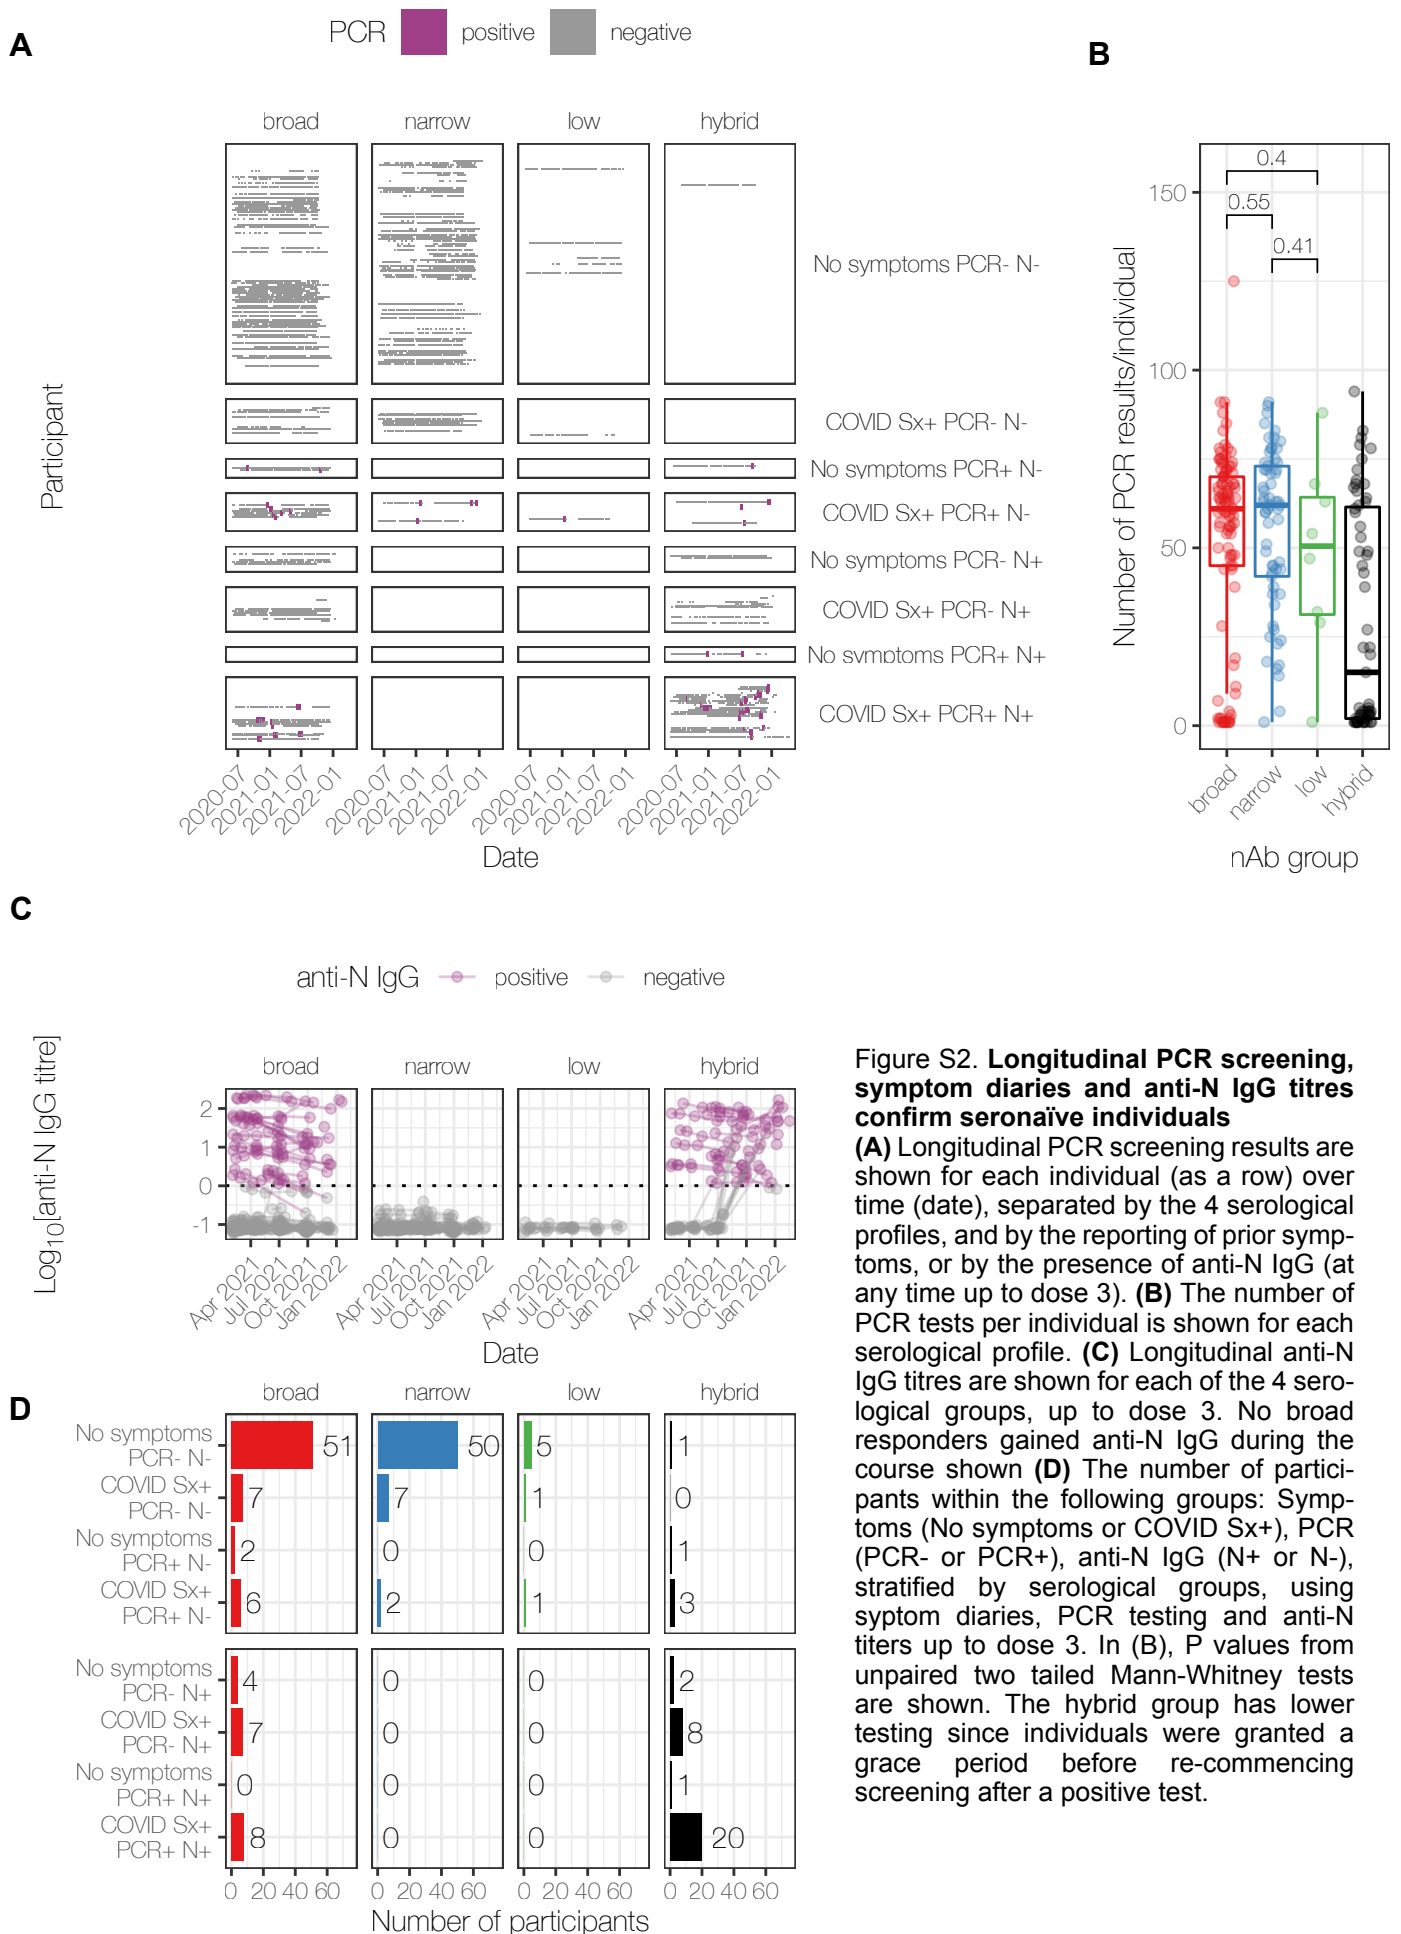

**Figure S2. Longitudinal PCR screening, symptom diaries and anti-N IgG titres confirm seronegative individuals**

**(A)** Longitudinal PCR screening results are shown for each individual (as a row) over time (date), separated by the 4 serological profiles, and by the reporting of prior symptoms, or by the presence of anti-N IgG (at any time up to dose 3). **(B)** The number of PCR tests per individual is shown for each serological profile. **(C)** Longitudinal anti-N IgG titres are shown for each of the 4 serological groups, up to dose 3. No broad responders gained anti-N IgG during the course shown **(D)** The number of participants within the following groups: Symptoms (No symptoms or COVID Sx+), PCR (PCR- or PCR+), anti-N IgG (N+ or N-), stratified by serological groups, using symptom diaries, PCR testing and anti-N titers up to dose 3. In (B), P values from unpaired two tailed Mann-Whitney tests are shown. The hybrid group has lower testing since individuals were granted a grace period before re-commencing screening after a positive test.



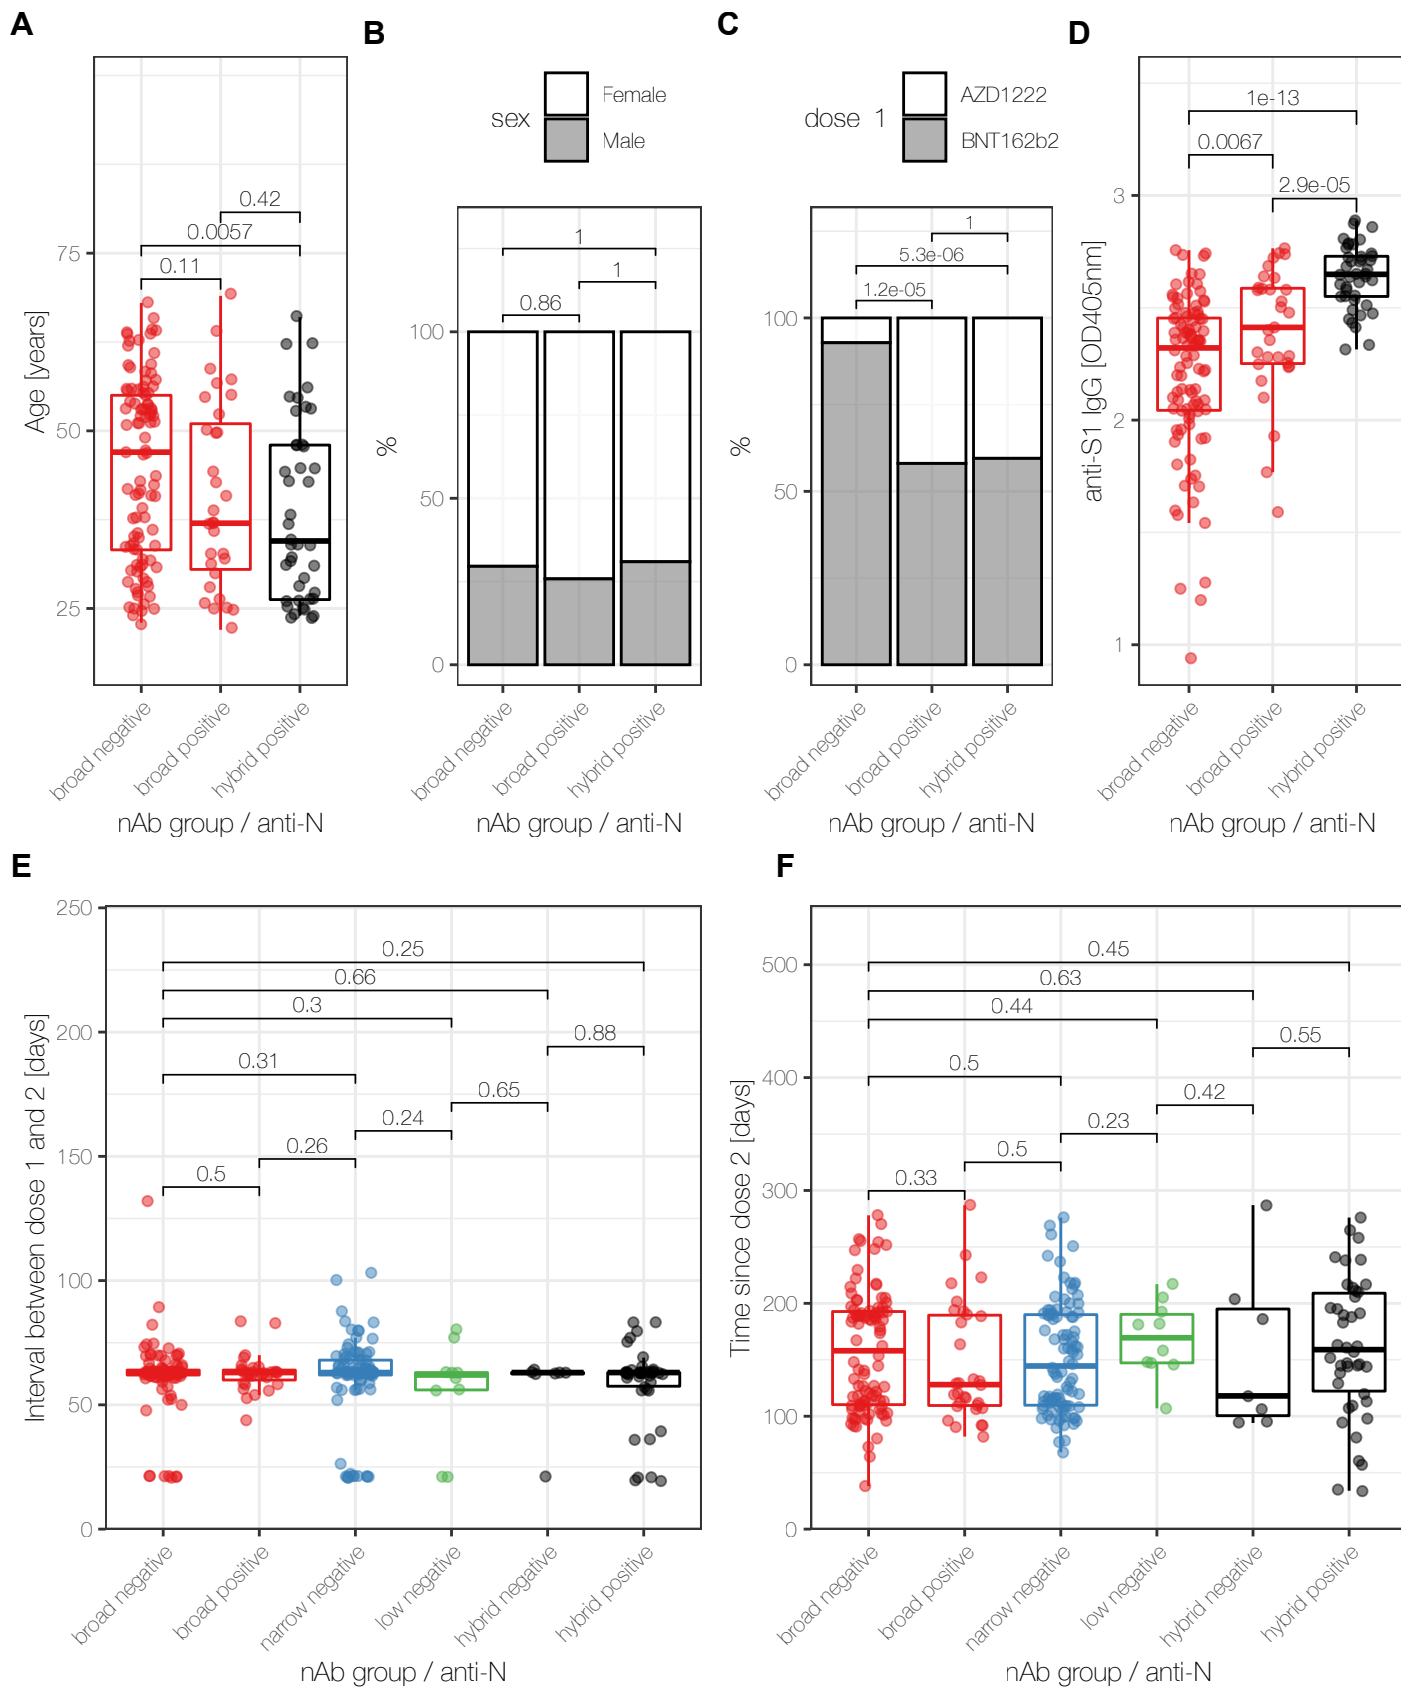

**Figure S3. Demographics, vaccine usage and dose intervals for broad anti-N IgG seropositive or seronegative individuals**

**(A)-(D)** Age in years (A) or sex (B) or vaccine used for doses 1 and 2 (C) or anti-S1 binding titres (D) for broad anti-N seropositive and seronegative individuals, compared to hybrid responders.

**(E)-(F)** Time interval in days between doses 1 and 2 (E) or serum sampling time from dose 2 (F) for all serological groups, stratified by anti-N result.

In (A, D-F), P values shown are from two tailed unpaired Mann-Whitney tests, without multiple correction testing. In (B-C) P values are from  $\chi^2$  tests.

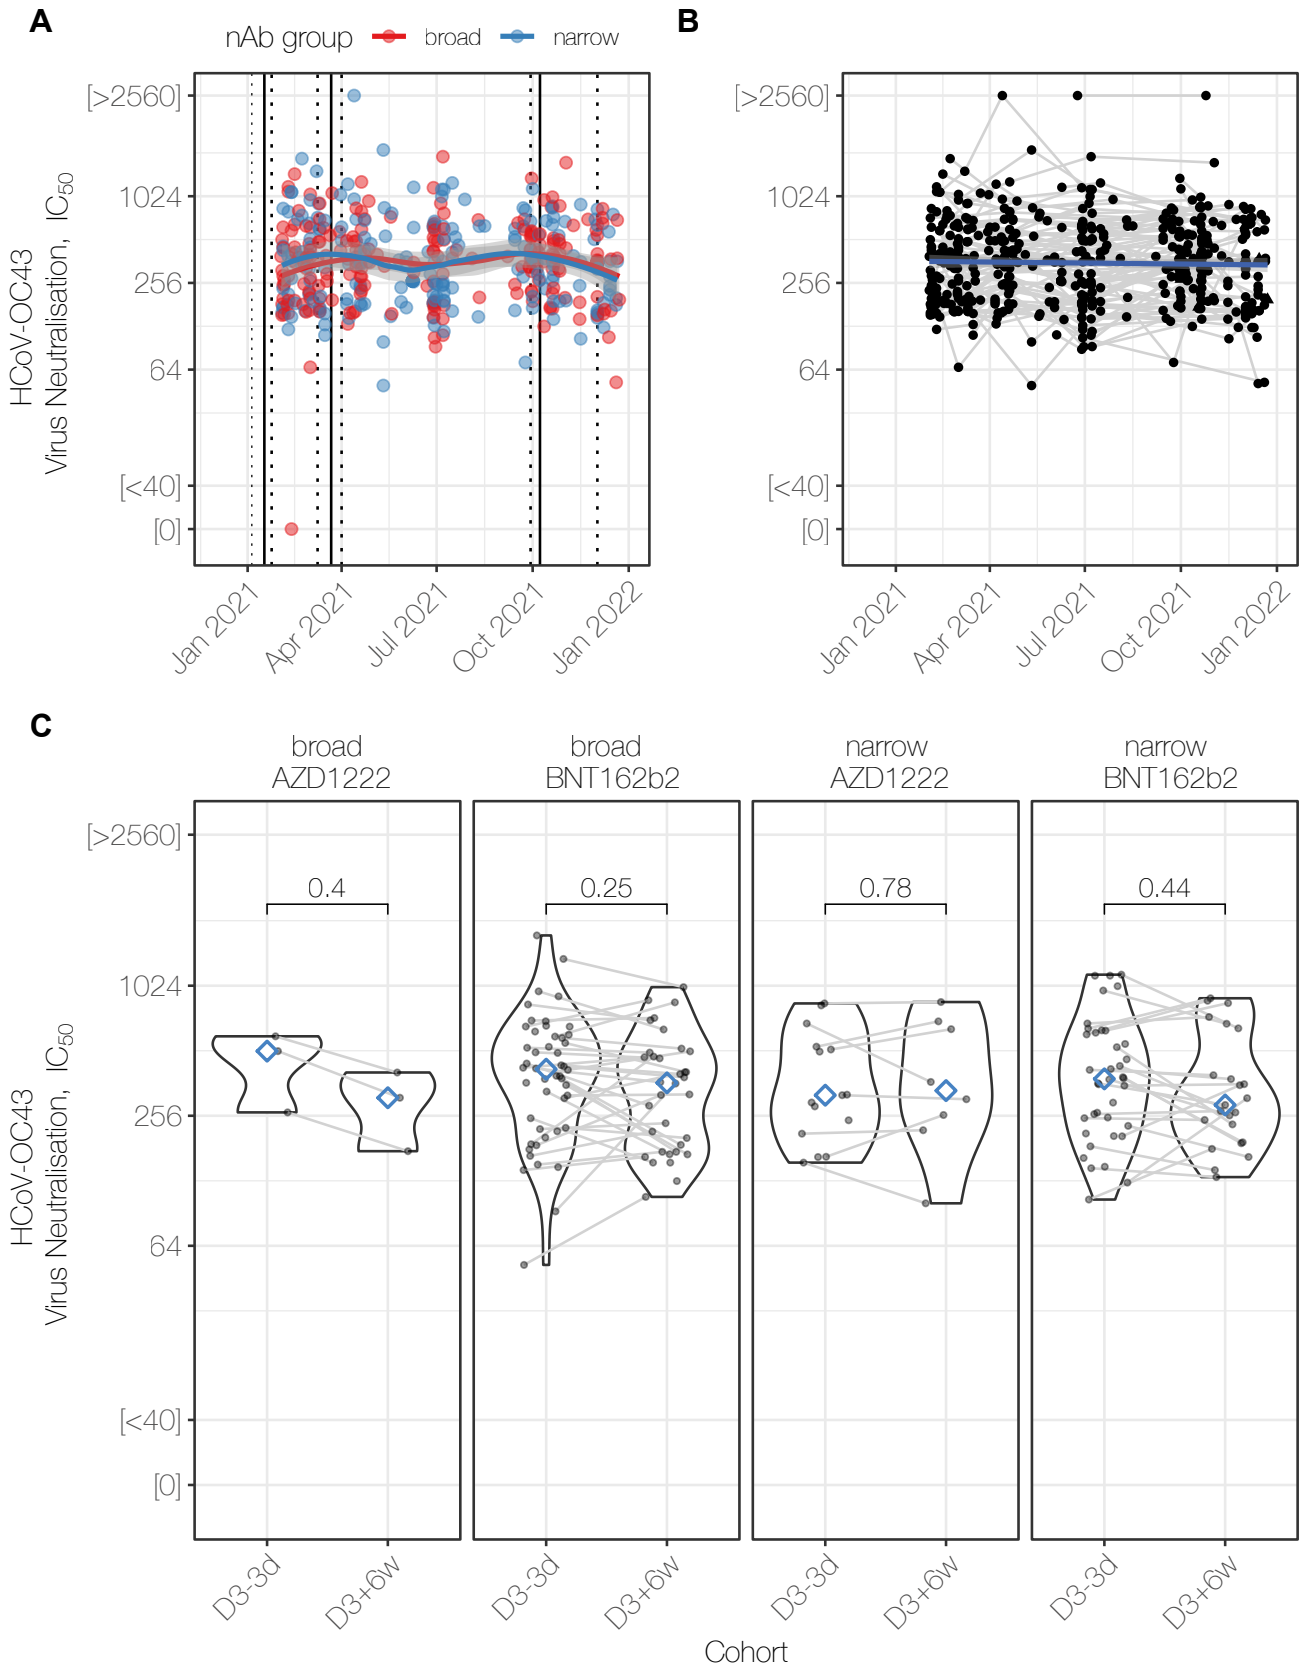

**Figure S4. Neutralization of the seasonal human coronavirus HCoV-OC43 is not augmented by SARS-CoV-2 vaccination or infection.**

**(A)** HCoV-OC43 live-virus microneutralization titer trajectories for broad and narrow responders. The median dates of vaccine doses and their interquartile ranges are shown by the vertical solid and dashed lines respectively. Neutralization titers are expressed as reciprocal of dilution with 50% inhibition of viral infection ( $IC_{50}$ ). **(B)** As in (A), with a linear regression fit to demonstrate rate of waning **(C)** HCoV-OC43 neutralization before (median -91d; IQR 9-77d) and up to 6 weeks after (median 23d, IQR 18-31d) dose 3 in broad and narrow responders, stratified by their primary vaccination course.

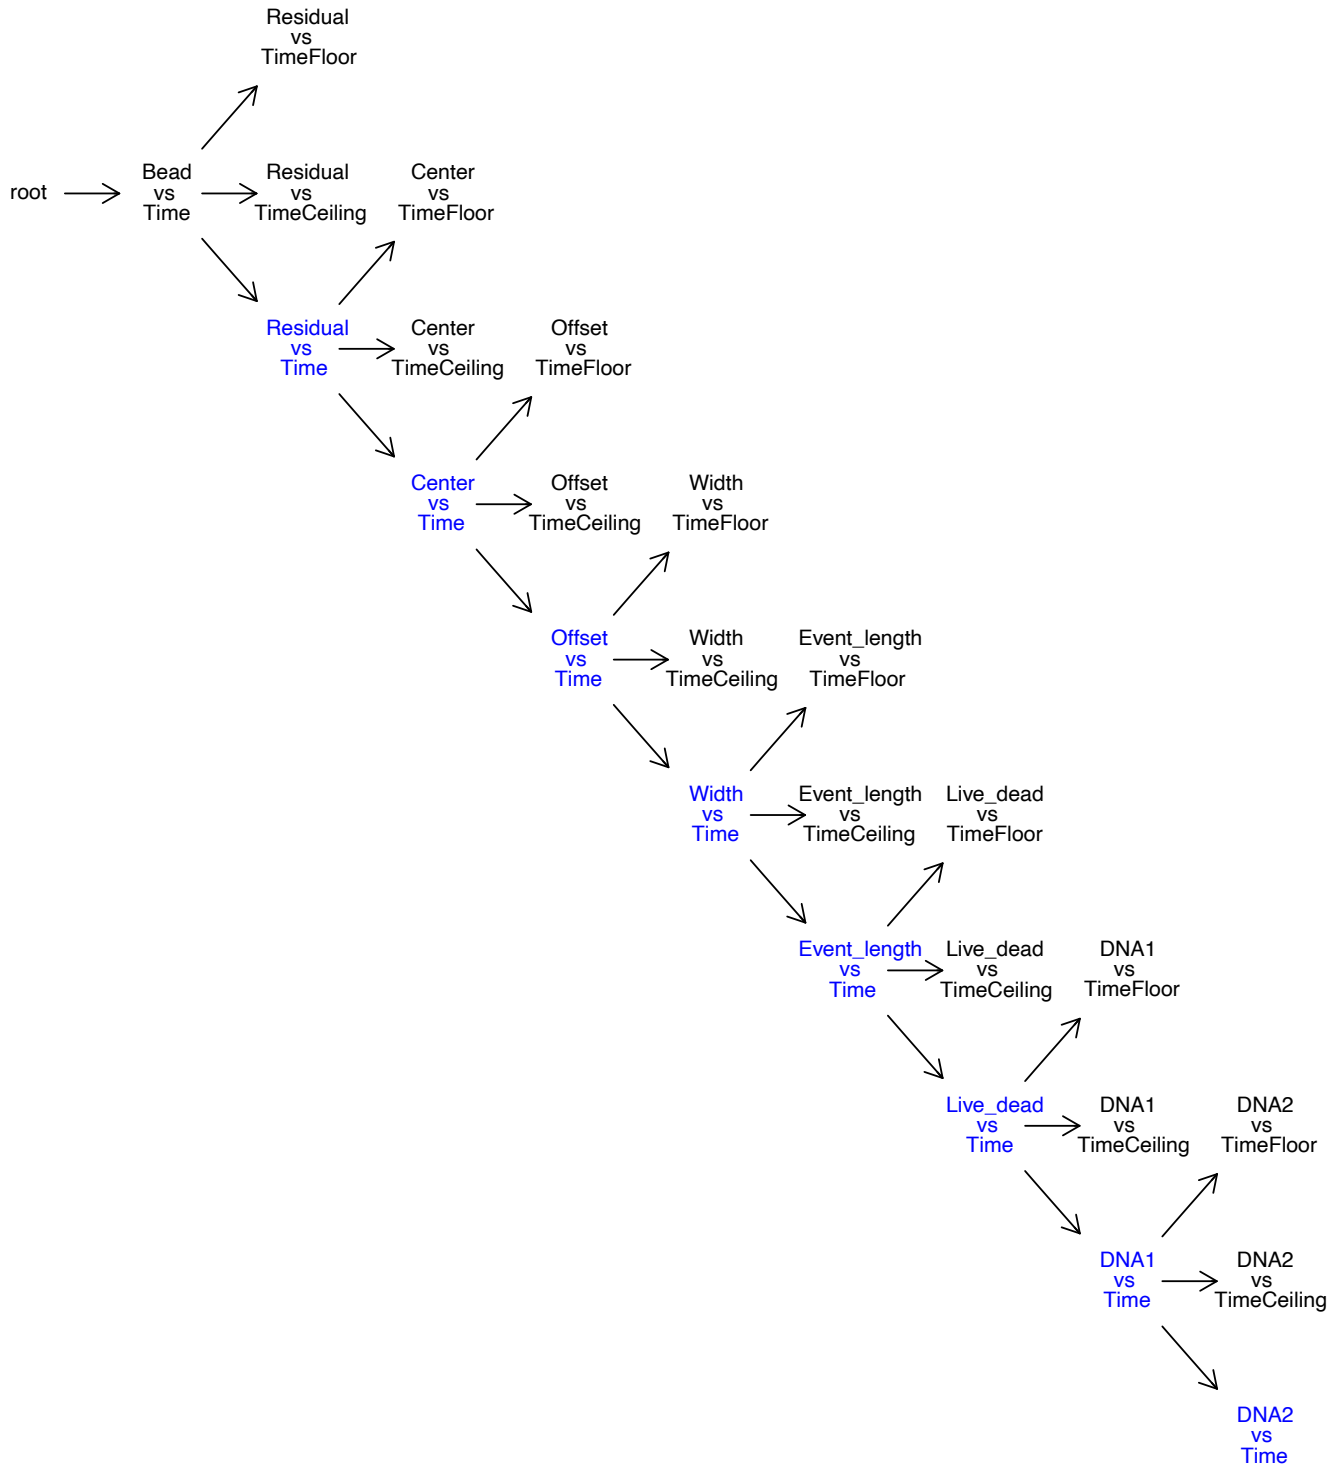

Figure S5. **Mass Cytometry gating tree**

Gating hierarchy progressing from raw events to processed single cells for downstream analysis. See Figure S6 for illustrative gates, and Figure S7 for flowSOM based quality control before biological clustering.

**A**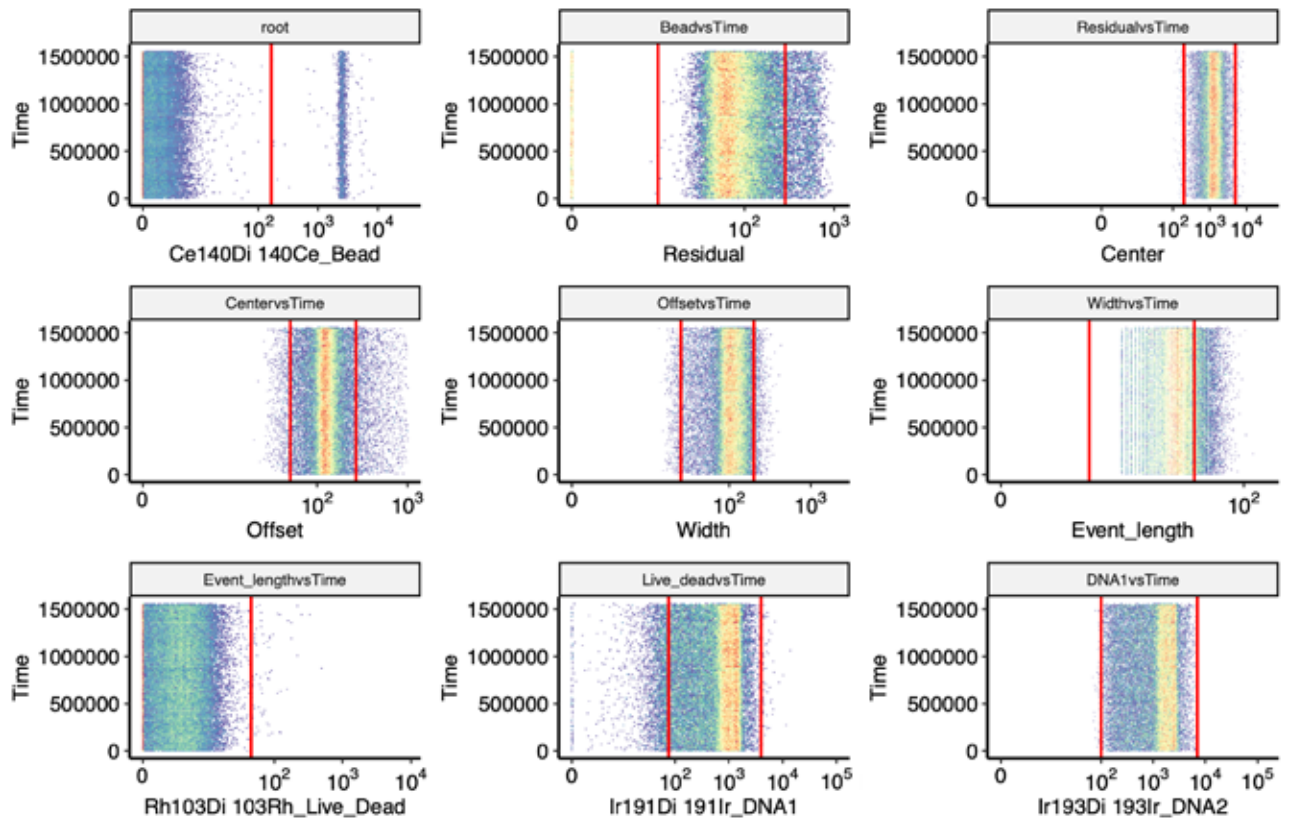**B**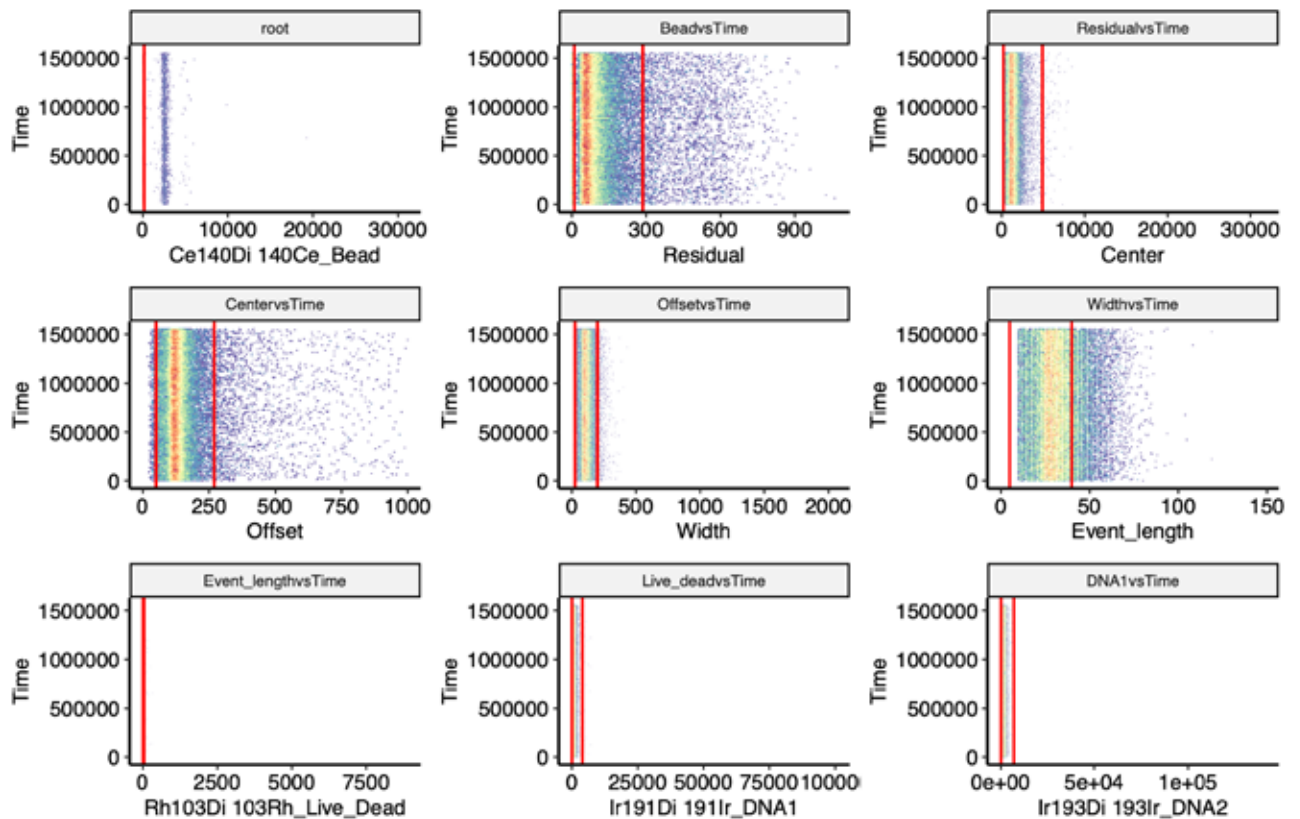

Figure S6. **Mass Cytometry gating strategy**

**(A)** and **(B)** Sequential gating of events. First QC-beads are gated out (top left) and samples progress through the gating hierarchy (Figure S5), by row left-right to processed single cells.

In **(A)** parameters are plotted after inverse hyperbolic sine transformation (fasinH) and in **(B)** the same parameters are plotted as a linear transform. Details of the gating algorithm are described in the Methods.

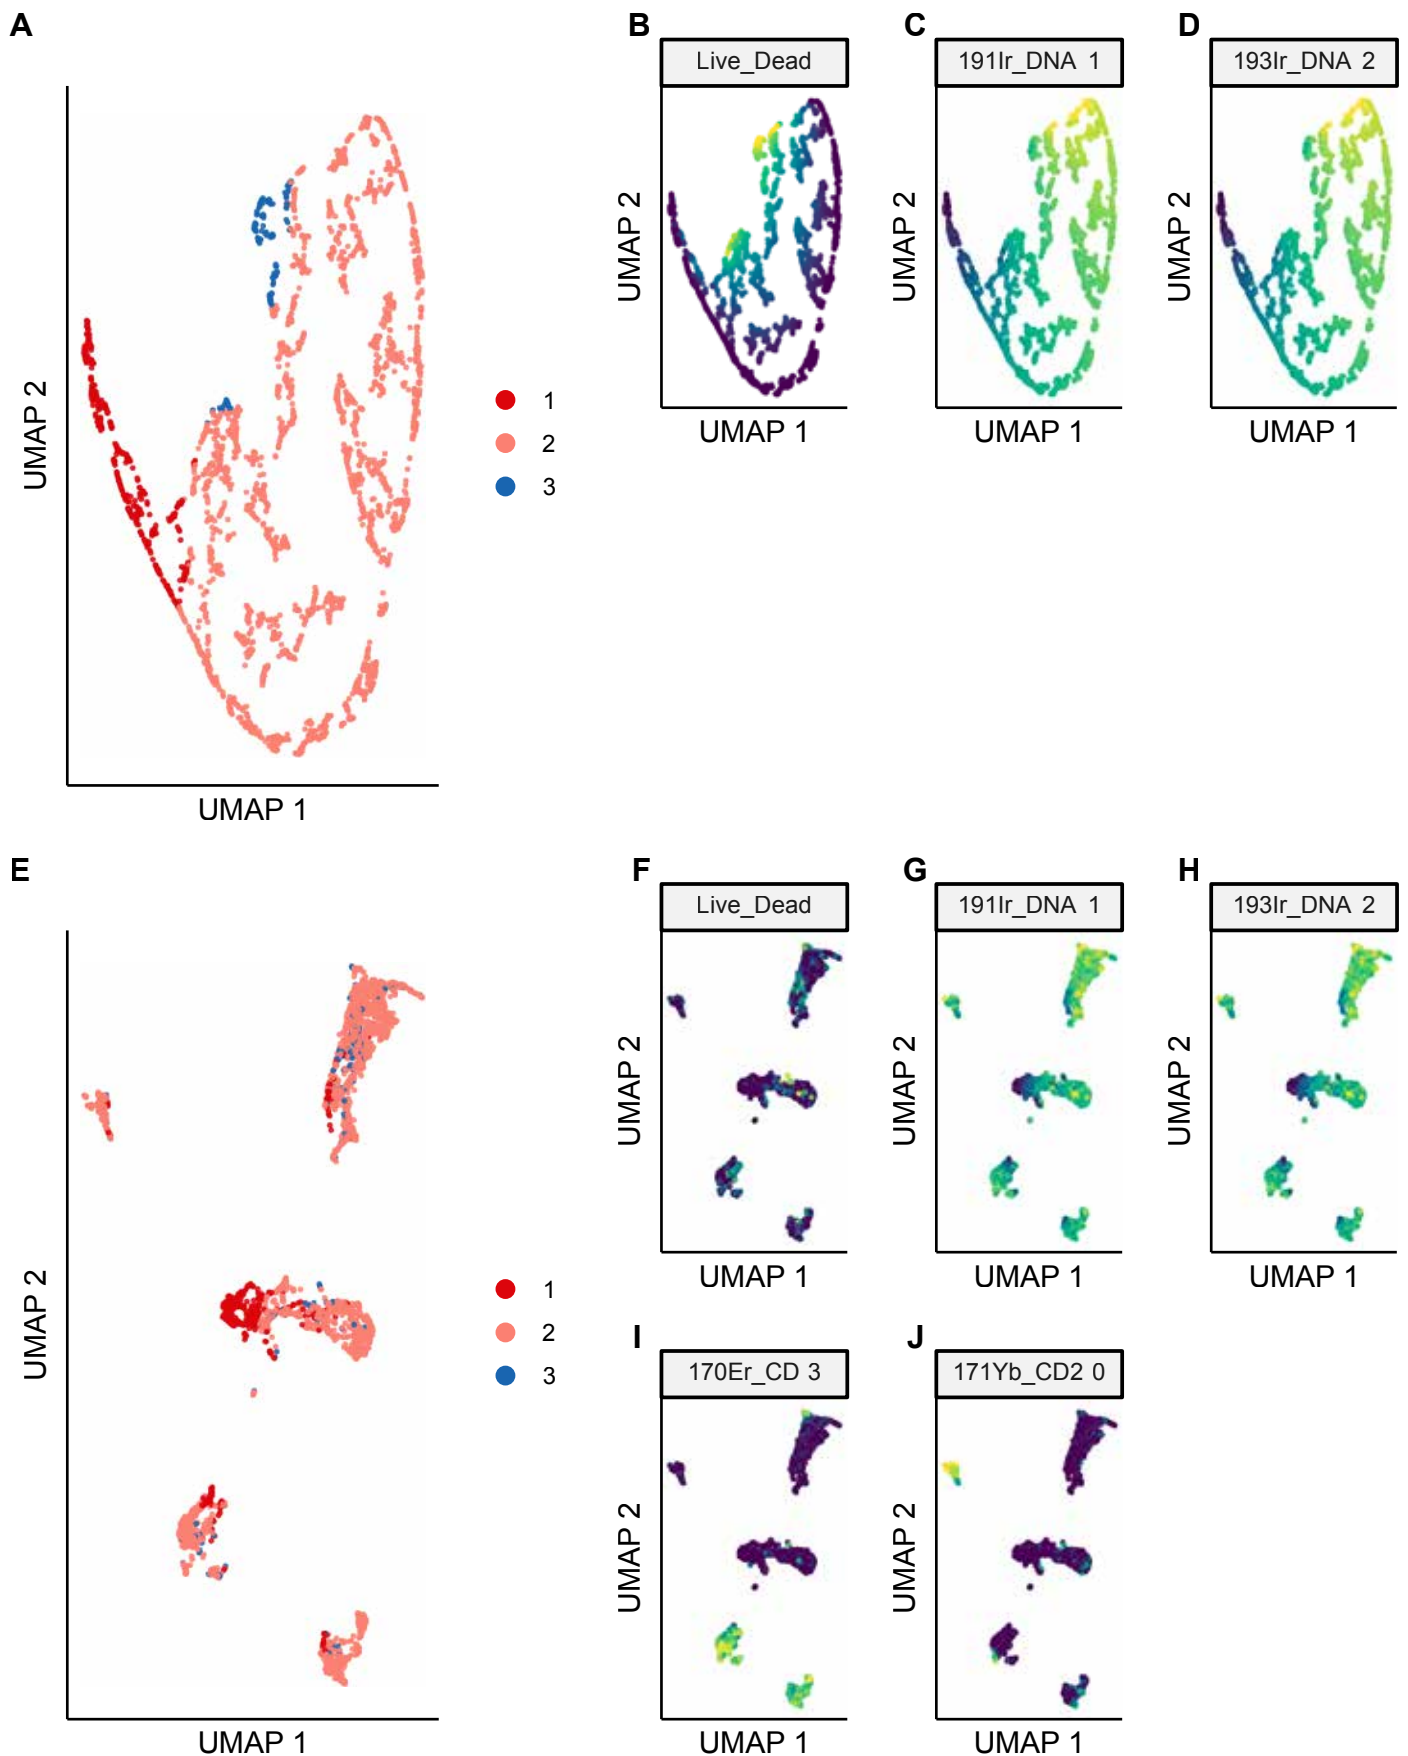

Figure S7. **Mass cytometry quality control using live/dead and DNA1 + DNA2**

**(A)** UMAP embedding of gated events, after flowSOM and ConsensusClusterPlus performed with the following channels: live/dead exclusion, DNA1 and DNA2.

**(B)-(D)** UMAP embedding from (A) shaded by the intensity of signal from each channel: live/dead exclusion (B), DNA1 (C) and DNA2 (D). **(E)** UMAP embedding of gated events, after flowSOM and ConsensusClusterPlus performed with the following channels: CD3, CD20, CD19, CD14, CD16, CD161, CD56, CD45RA, CD45RO, CD4, CD8a, CD11c, live/dead and DNA1 and DNA2. The shading reflects the clustering in (A).

**(F)-(J)** UMAP embedding from (E) shaded by the indicated marker.

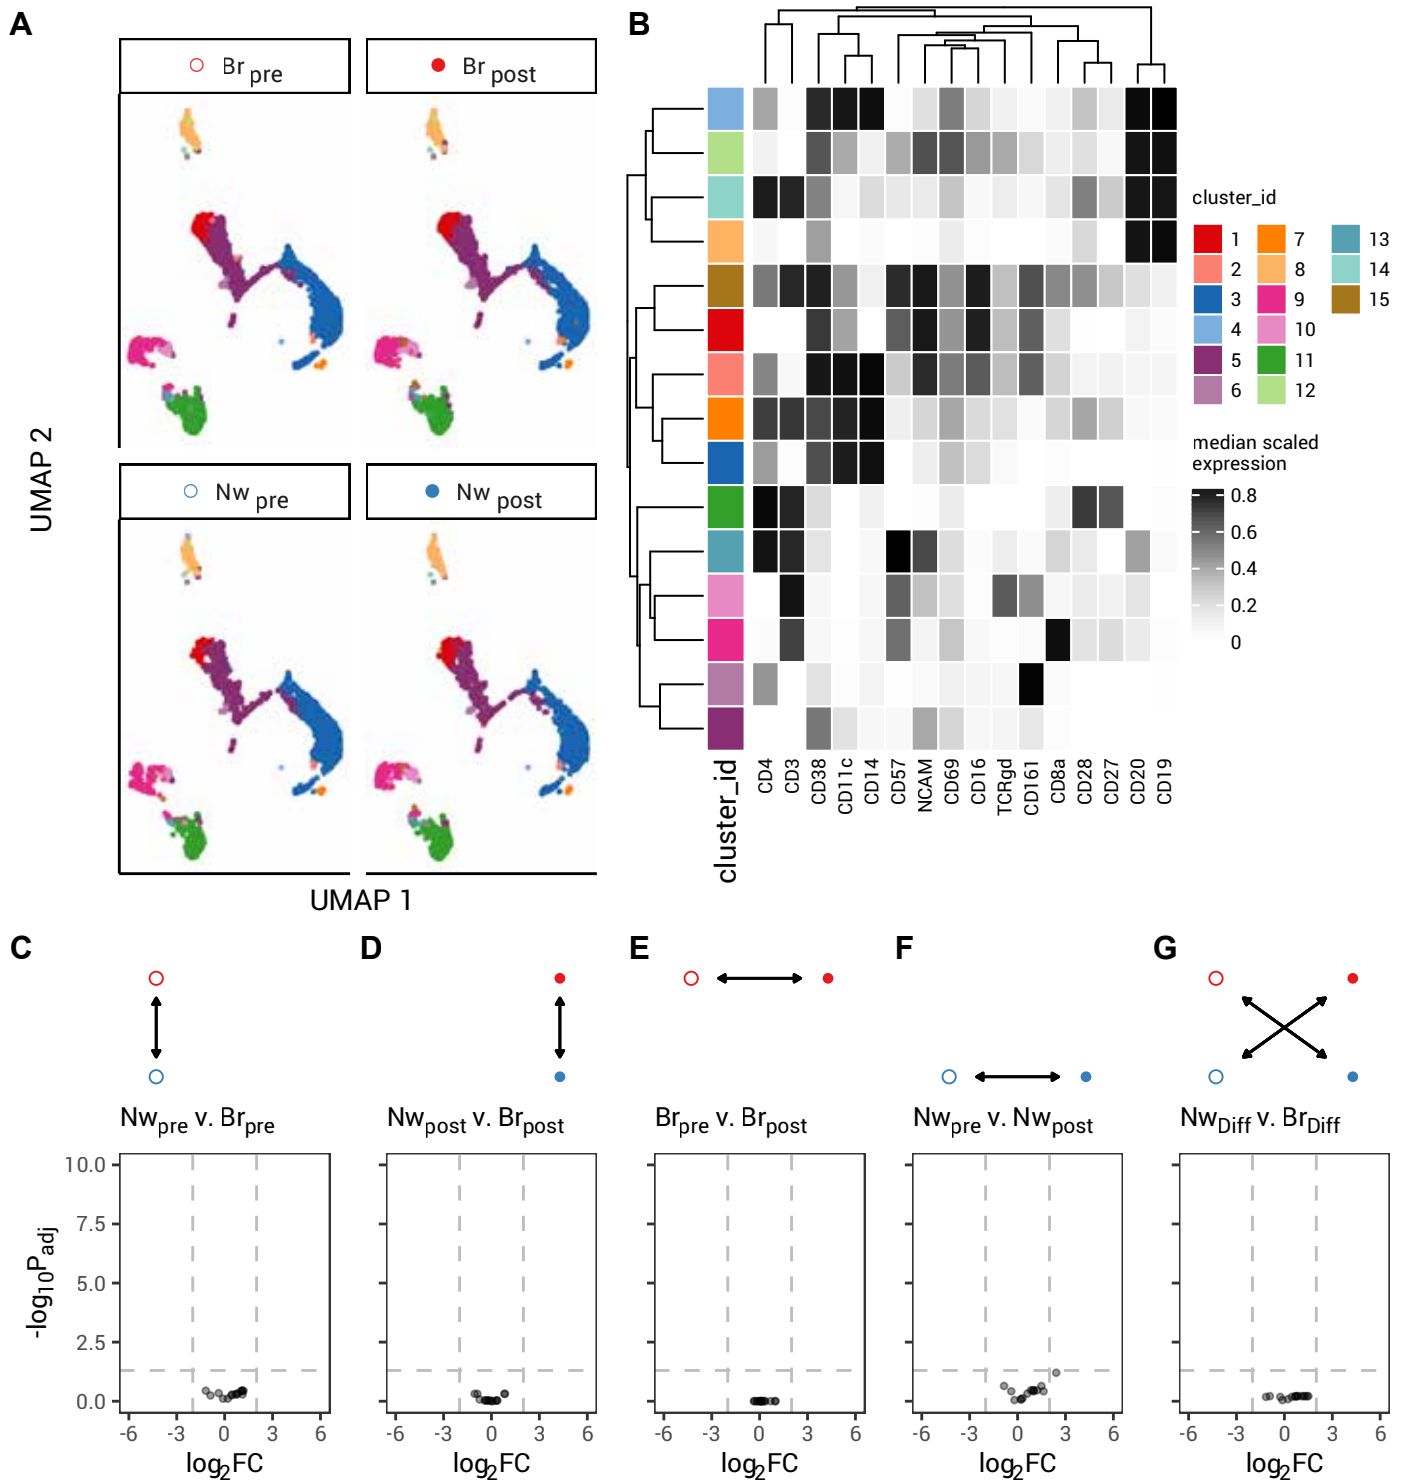

Figure S8. **PBMC-level mass cytometry analysis**

**(A)** UMAP embedding of peripheral blood mononuclear cells (PBMC) separated by breadth (Nw narrow, n=6; Br broad, n=11) and before (pre) and after (post) vaccination. 15 clusters identified by FlowSOM and ConsensusClusteringPlus are shaded.

**(B)** Heatmap of surface expression of selected markers for the clusters shown in (A). Rows represent the clusters shown in (A), and their color key is shared. Columns reflect the labelled cell surface marker. Scaled expression is shown from blue (low/no expression) to yellow (high expression). Cluster 9 are CD8<sup>+</sup> T cells, with the adjacent cluster 10 being TCR $\gamma\delta^+$  T cells.

**(C)-(G)** Differential abundance analysis for the 15 PBMC clusters shown in (A) and (B), for the comparisons indicated: narrow pre vs broad pre in (C); narrow post vs broad post in (D); broad pre vs. broad post in (E); narrow pre vs. narrow post in (F); and the difference between (narrow pre vs. narrow post) and (broad pre vs. broad post) in (G).  $\log_2$  fold change  $\pm 1$  and  $P_{adj}=0.05$  are shown by dashed lines.
